# Supplementary material for: Alginate-based diblock polymers: preparation, characterization and Ca-induced self-assembly
Source: Royal Society of Chemistry journal article supplement (doi:10.1039/d1py00727k), 2021-01-01
Supplement: d1py00727k1.pdf [file d1py00727k1.pdf]

## Supporting Information

# Alginate-based diblock polymers: Preparation, characterization and Ca-induced self-assembly

*Amalie Solberg<sup>†</sup>, Ingrid V. Mo<sup>†</sup>, Finn L. Aachmann<sup>†</sup>, Christophe Schatz<sup>‡</sup> and Bjørn E. Christensen<sup>†\*</sup>*

<sup>†</sup>NOBIPOL, Department of Biotechnology and Food Science, NTNU Norwegian University of Science and Technology, Sem Sælands vei 6/8, NO-7491 Trondheim, Norway

<sup>‡</sup>LCPO, Université de Bordeaux, UMR 5629, ENSCBP, 16, Avenue Pey Berland, 33607 Pessac Cedex, France

### Contents

|                                                                                                    |    |
|----------------------------------------------------------------------------------------------------|----|
| <b>Preparation and characterization of guluronate oligomers (G<sub>n</sub>)</b> .....              | 2  |
| <b>Conjugation with PDHA</b> .....                                                                 | 4  |
| <b>Conjugation with ADH</b> .....                                                                  | 13 |
| <b>Attachment of the second block: A-<i>b</i>-B diblock polysaccharides</b> .....                  | 16 |
| <b>Reduction of oximes/hydrazones/N-pyranosides with <math>\alpha</math>-picoline borane</b> ..... | 19 |
| <b>References</b> .....                                                                            | 26 |

## Preparation and characterization of guluronate oligomers ( $G_n$ )

Pure guluronate oligomers ( $G_n$ ) were prepared by acid precipitation of guluronate rich alginates, removing any oligomers containing one or more M-residue(s).

A study using high-performance anion-exchange chromatography with pulsed amperometric detection (HPAEC-PAD) was performed, monitoring the acid hydrolysis of a guluronate with  $DP_n$  20, enabling tailoring of the resulting  $DP_n$ .

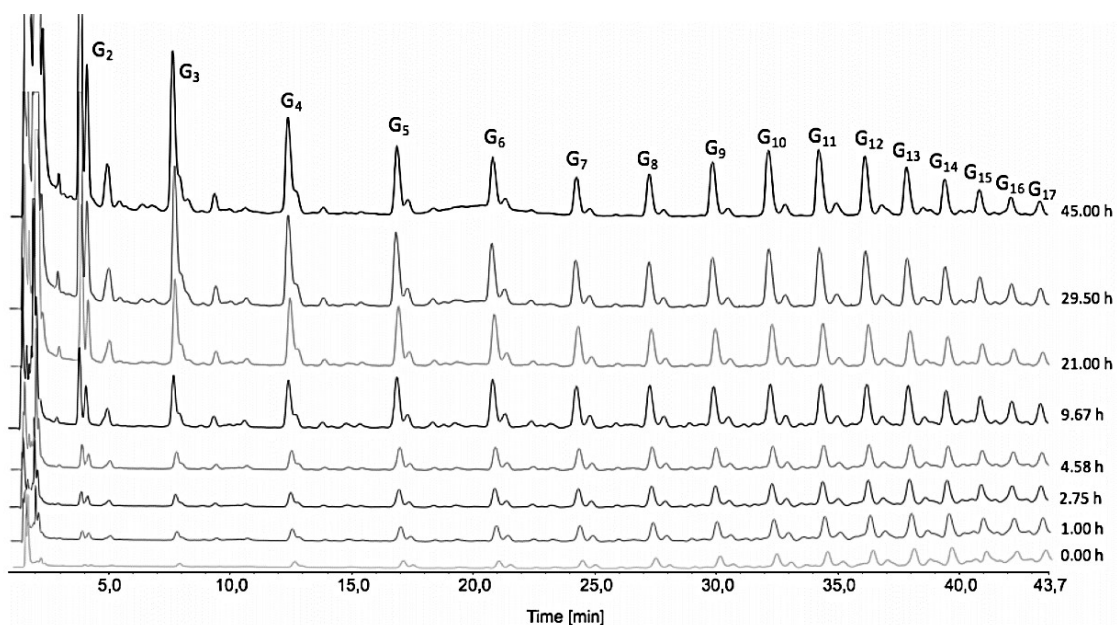

**Fig. S1** HPAEC-PADH chromatograms for guluronate oligomers taken at different timepoints during hydrolysis (95°C, pH 3.62).

Oligomers with defined  $DP_n$  were prepared by GFC, and  $DP_n$  was verified by  $^1H$ -NMR (Fig. S3). Isolated triguluronate was annotated according to literature<sup>1</sup>.

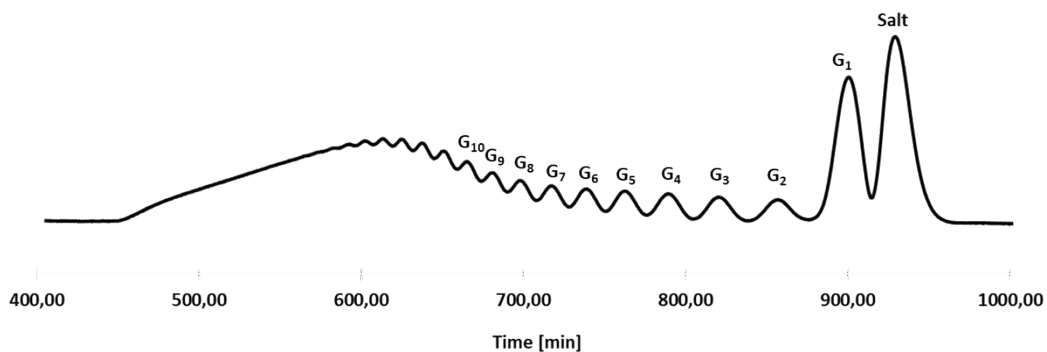

**Fig. S2** GFC fractionation of guluronate oligomers (guluronate with DPn 20 hydrolyzed for 9 h at 95°, pH 3.61).

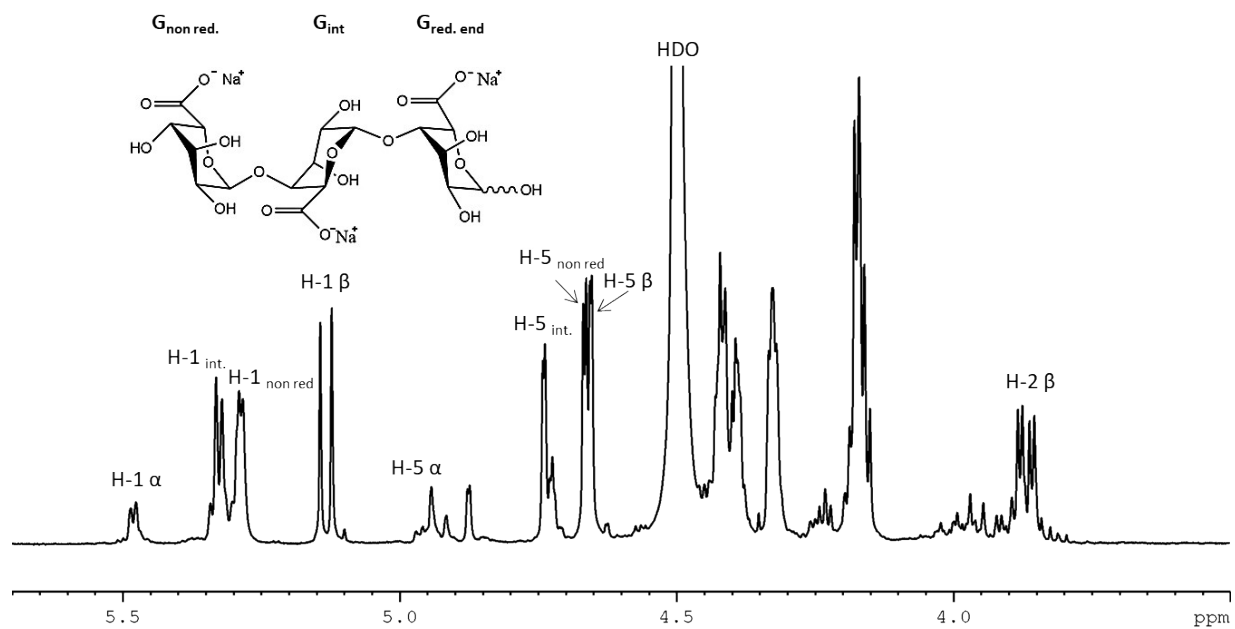

**Fig. S3**  $^1\text{H-NMR}$  (82 °C, 400 MHz) spectrum of isolated triguluronate, peaks were assigned according to literature <sup>1</sup>.

## Conjugation with PDHA

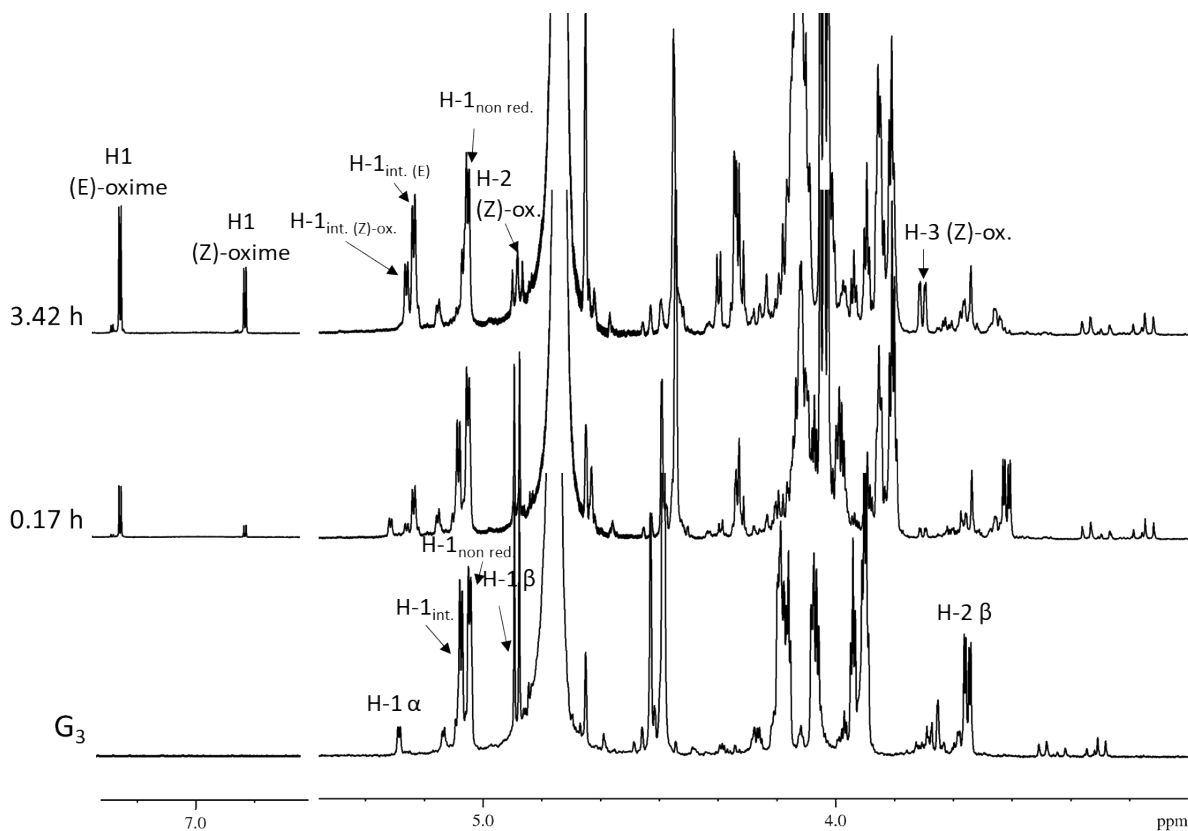

**Fig. S4** Stack of <sup>1</sup>H-NMR spectra obtained after different timepoints for the reaction with G<sub>3</sub> (7mM) and PDHA (2 equiv.) in 500 mM AcOH[d<sub>4</sub>] pD 4 (27 °C, 600 MHz). Pure G<sub>3</sub> (in buffer) is included for comparison.

The equilibrium reaction mixture with G<sub>3</sub> and PDHA was characterized by heteronuclear NMR.

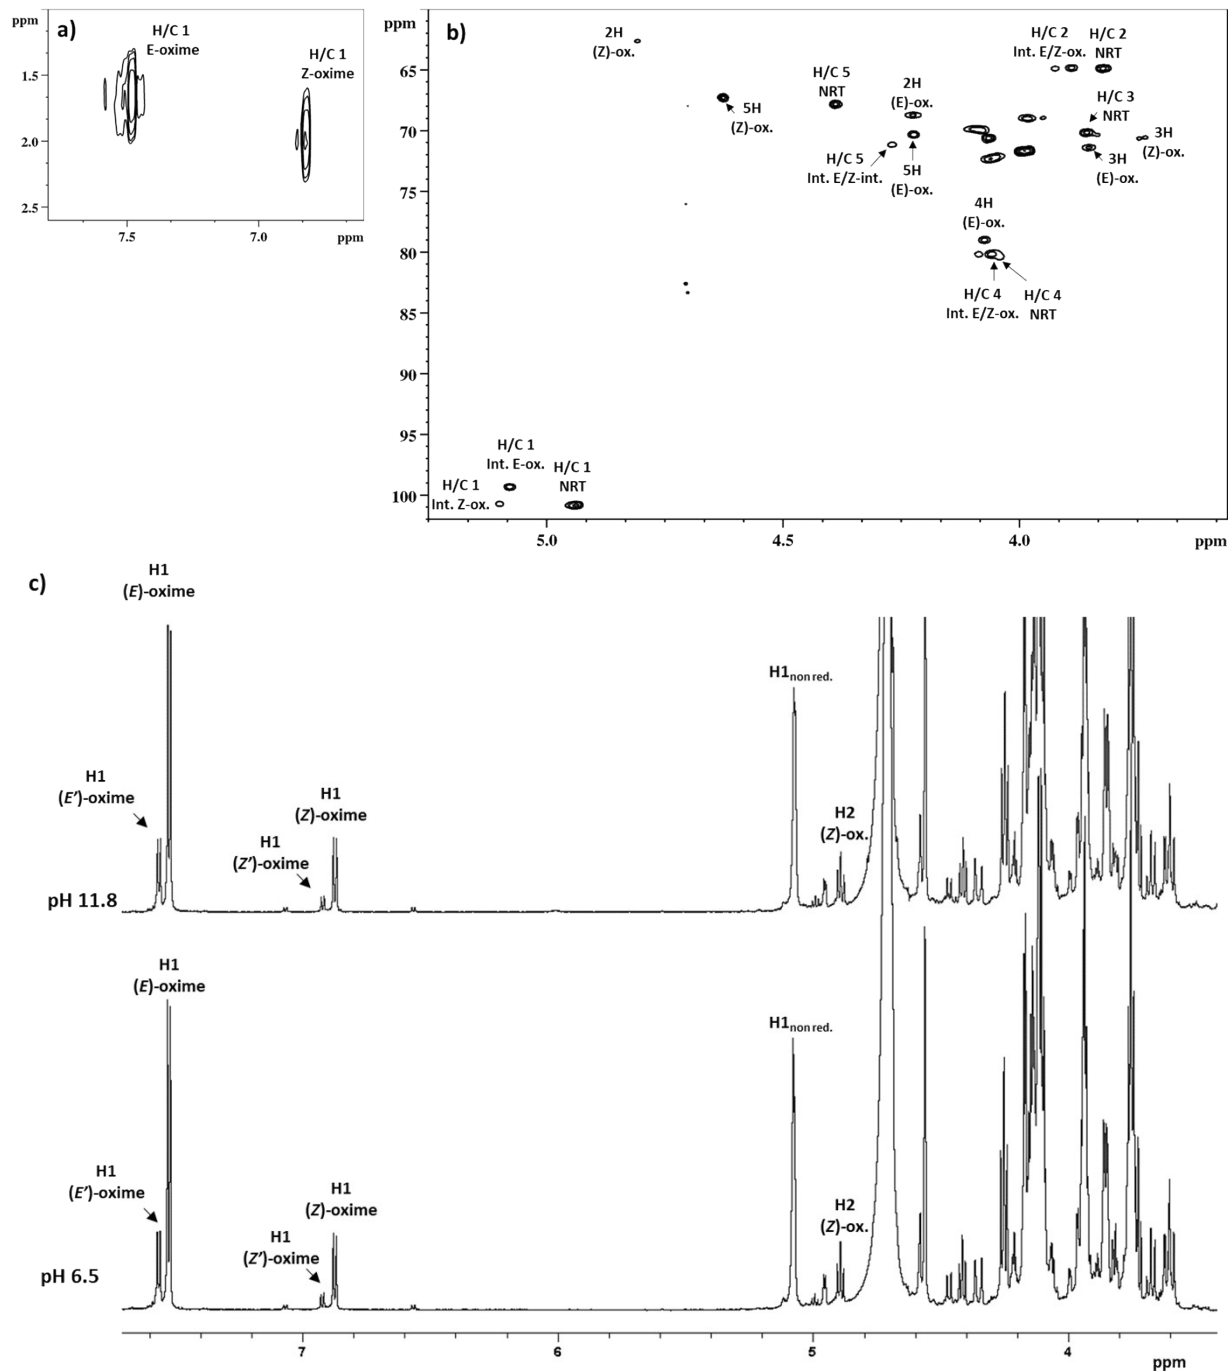

**Fig. S5** a,b) <sup>13</sup>C HSQC of the reaction mixture obtained for the conjugation with G<sub>3</sub> (7mM) and PDHA (2 equiv.) (500 mM AcOH[d<sub>4</sub>] pD 4) recorded at t > 24 h (82 °C, NEO 600 MHz magnet). c) <sup>1</sup>H-NMR spectra of G<sub>3</sub>-PDHA after purification by GFC and dialysis in D<sub>2</sub>O at pH 6.5 and 11.8 (27 °C, 600 MHz)

|                | H1/C1        | H2/C2       | H3/C3       | H4/C4       | H5/C5       | C6    |
|----------------|--------------|-------------|-------------|-------------|-------------|-------|
| (E)-oxime      | 7.48; 151.5  | 4.23; 68.6  | 3.86; 71.38 | 4.07; 79.0  | 4.22; 70.3  | 177.1 |
| (Z)-oxime      | 6.83; 152.0  | 4.81; 62.63 | 3.74; 70.65 | 4.03; 80.35 | 4.27; 71.24 | 175.2 |
| Int. (E)-oxime | 5.07; 99.22  | 3.89; 64.86 | 3.97; 68.92 | 4.08; 79.0  | 4.27; 71.16 | 177.1 |
| Int. (Z)-oxime | 5.09; 100.5  | 3.92; 64.89 | 3.99; 68.92 | 4.04; 80.42 | 4.27; 71.16 | 177.1 |
| NRT            | 4.94; 100.77 | 3.82; 70.19 | 3.86; 70.65 | 4.07; 80.2  | 4.39; 67.8  | 175.2 |

The reaction kinetics was determined by integrating the <sup>1</sup>H-NMR spectra, using H1 of the non-reducing end and TSP as internal standards. A simple model based on first order kinetics was used to determine the rate constants ( $k_T$  and  $k_{-T}$ ) for the combined yield.

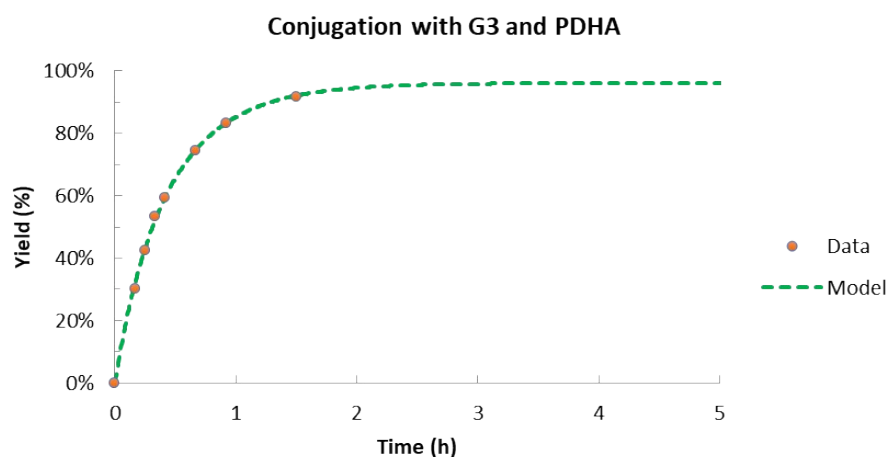

**Fig. S6** Conjugation with G<sub>3</sub> (7mM) and PDHA (2 equiv.) (500 mM AcOHd<sub>4</sub> pD 4) studied by time course NMR (27 °C, 600 MHz). Data obtained by integration using <sup>1</sup>H of the non-reducing ends as internal standard. A simple model assuming first order kinetics based on combined yield is included.

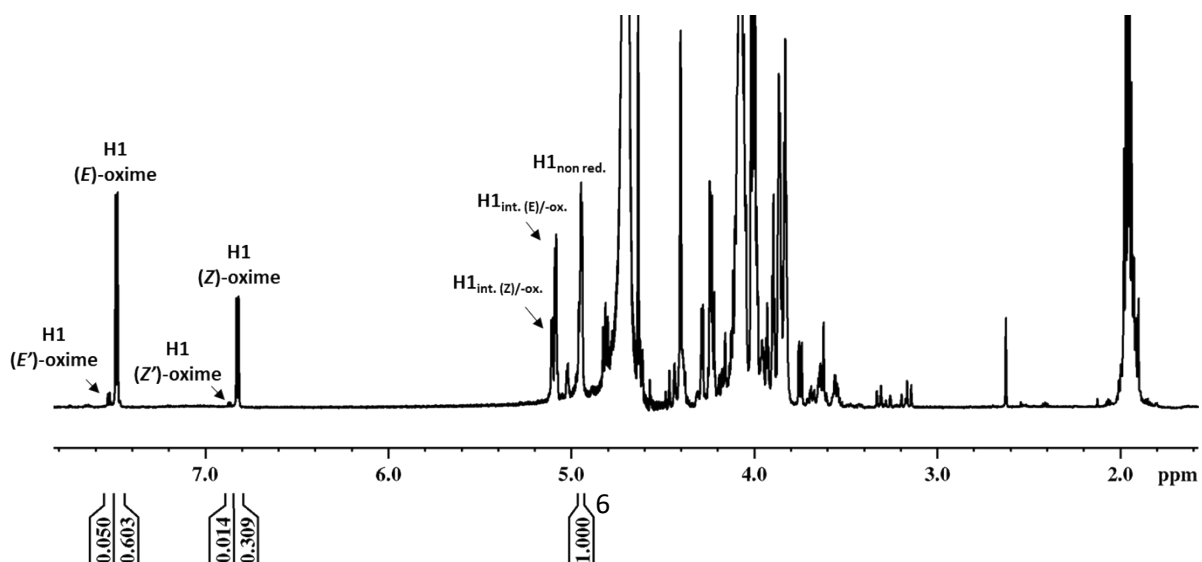

**Fig. S7**  $^1\text{H-NMR}$  spectra of the equilibrium reaction mixture with  $\text{G}_3$  (7mM) and PDHA (2 equiv.) (in 500 mM  $\text{AcOHd}_4$  pD 4 at 27 °C, 600 MHz) recorded after 4 h. Integration using H1 of the non-reducing end used to estimate yield is included.

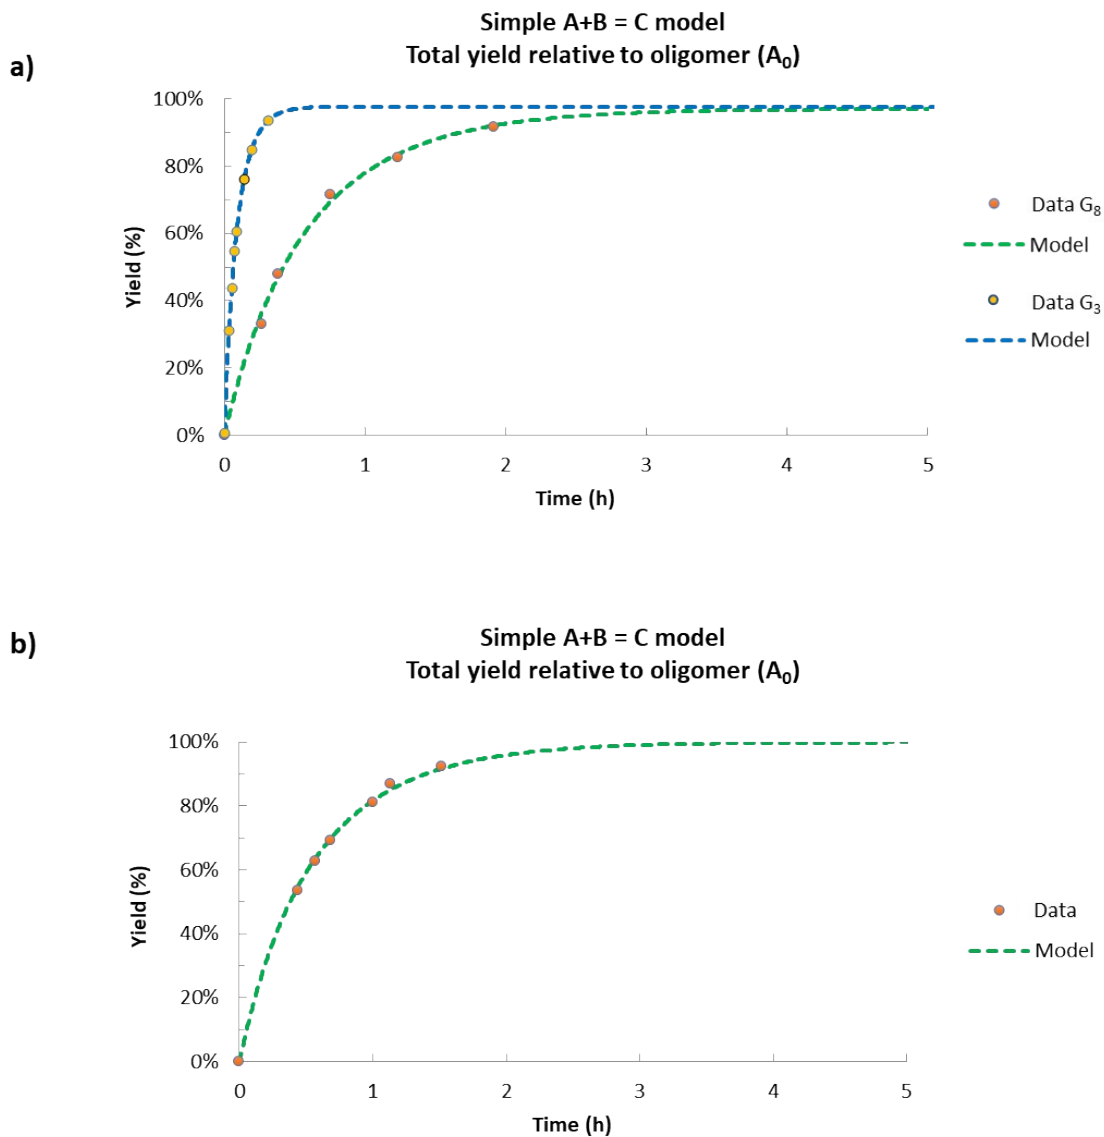

**Fig. S8** Plot with combined yield for conjugation with a)  $\text{G}_8$  (7mM) and b)  $\text{G}_6$  (20 mM) and PDHA (2 equiv.) (500 mM  $\text{AcOHd}_4$  pD 4) studied by time course NMR. Data obtained by integration using H1 of the non-reducing ends as internal standard. A simple model assuming first order kinetics based on combined yield is included.

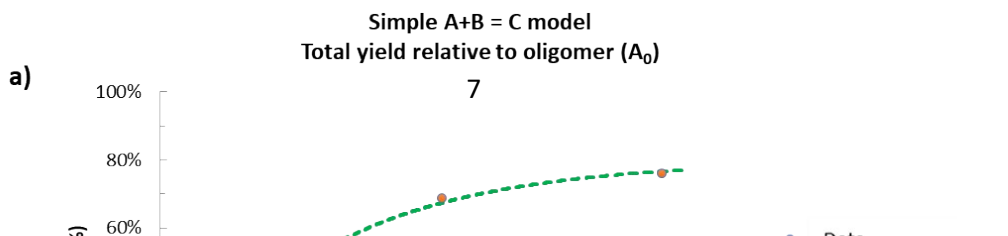

**Fig. S9** Plot with combined yield for conjugation with a) Dextran DP 3 (7mM) and b) Maltotriose (7 mM) and PDHA (2 equiv.) (500 mM AcOHd4 pD 4) studied by time course NMR (27 °C, 600 MHz). Data obtained by integration using H1 of the non-reducing ends or TSP as internal standard. A simple model assuming first order kinetics based on combined yield is included.

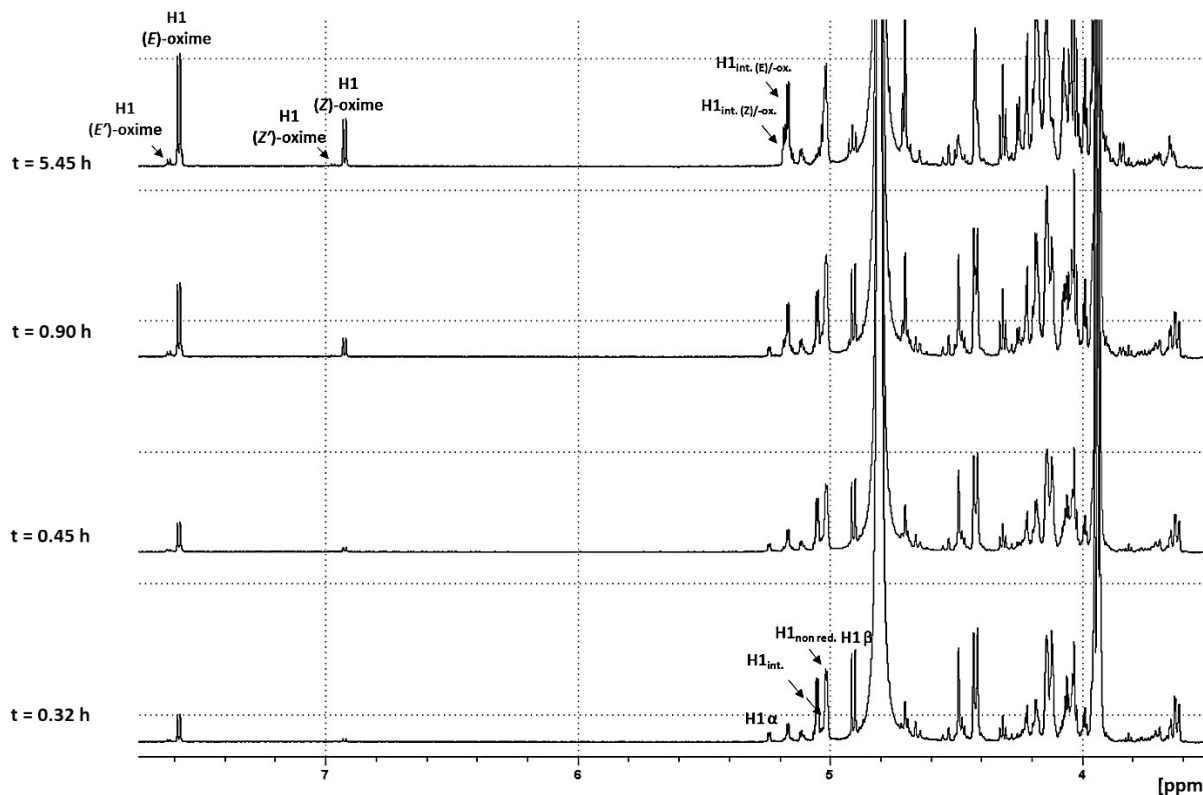

**Fig. S10** Stack of  $^1\text{H}$ -NMR spectra obtained at different time points for the reaction with  $\text{G}_3$  (7mM) and PDHA (2 equiv.) at pD 5 (500 mM AcOHd4, 27 °C, 600 MHz).

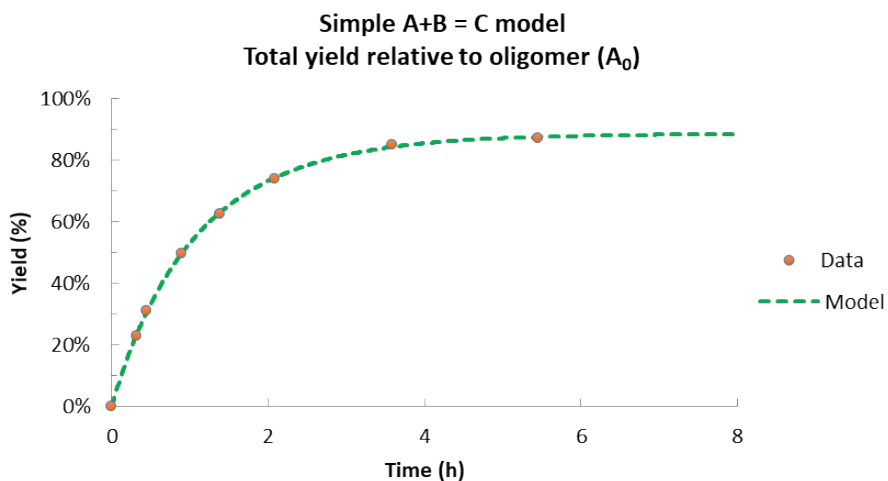

**Fig. S11** Conjugation with  $\text{G}_3$  (7mM) and PDHA (2 equiv.) at pD 5 (500 mM AcOHd4) studied by time



course NMR (obtained at 27 °C, using a 600 MHz magnet). Data obtained by integration using H1 of the non-reducing ends as internal standard. A simple model assuming first order kinetics based on combined yield is included.

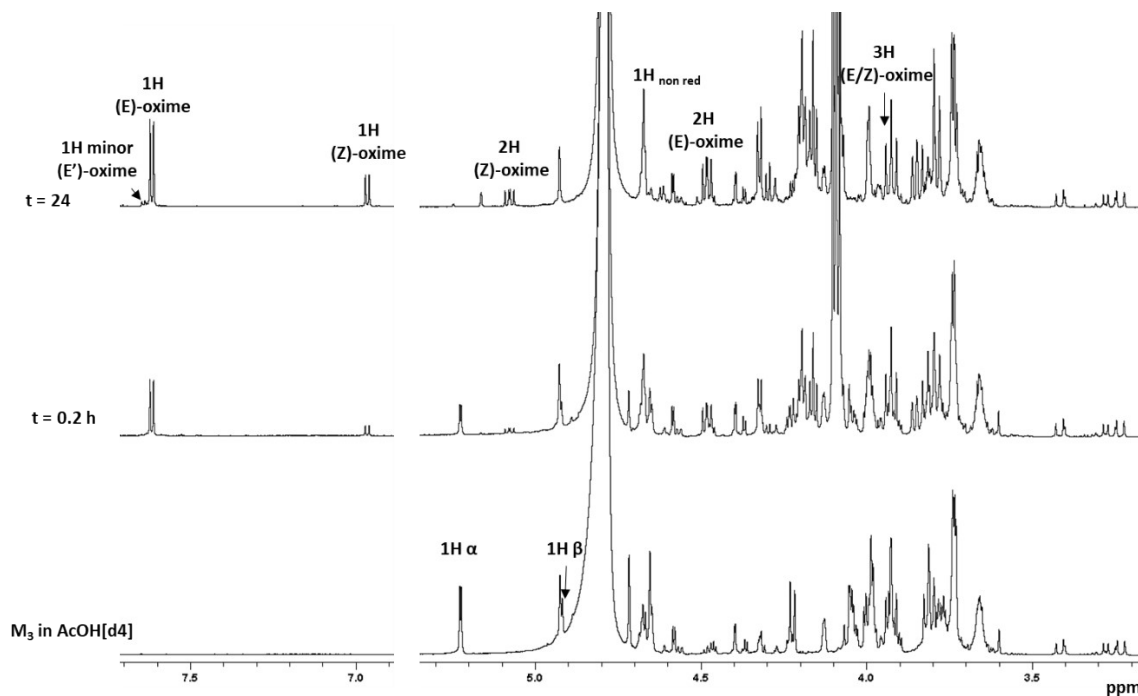

**Fig. S12** Stack of 1D <sup>1</sup>H-NMR spectra obtained at different timepoints for the reaction with M<sub>3</sub> (7mM) and PDHA (2 equiv.) in 500 mM AcOH[d<sub>4</sub>] (27 °C, 600 MHz) (M<sub>3</sub> is included for comparison). Key resonances indicative of the reaction are annotated.

The reaction mixture with M<sub>3</sub> and PDHA (24 h reaction time, 10 equiv. PDHA, 500 mM NaAc-buffer pH 4) was purified by GFC, dialysis and freeze drying.

H1 of the oxime conjugates were assigned based on literature<sup>2,3</sup>. H2 and H3 of the (E)- and (Z)-oxime was assigned using 1D selective COSY and TOCY NMR (Fig. S13). Complete assignment was obtained by heteronuclear NMR, Fig. S14.

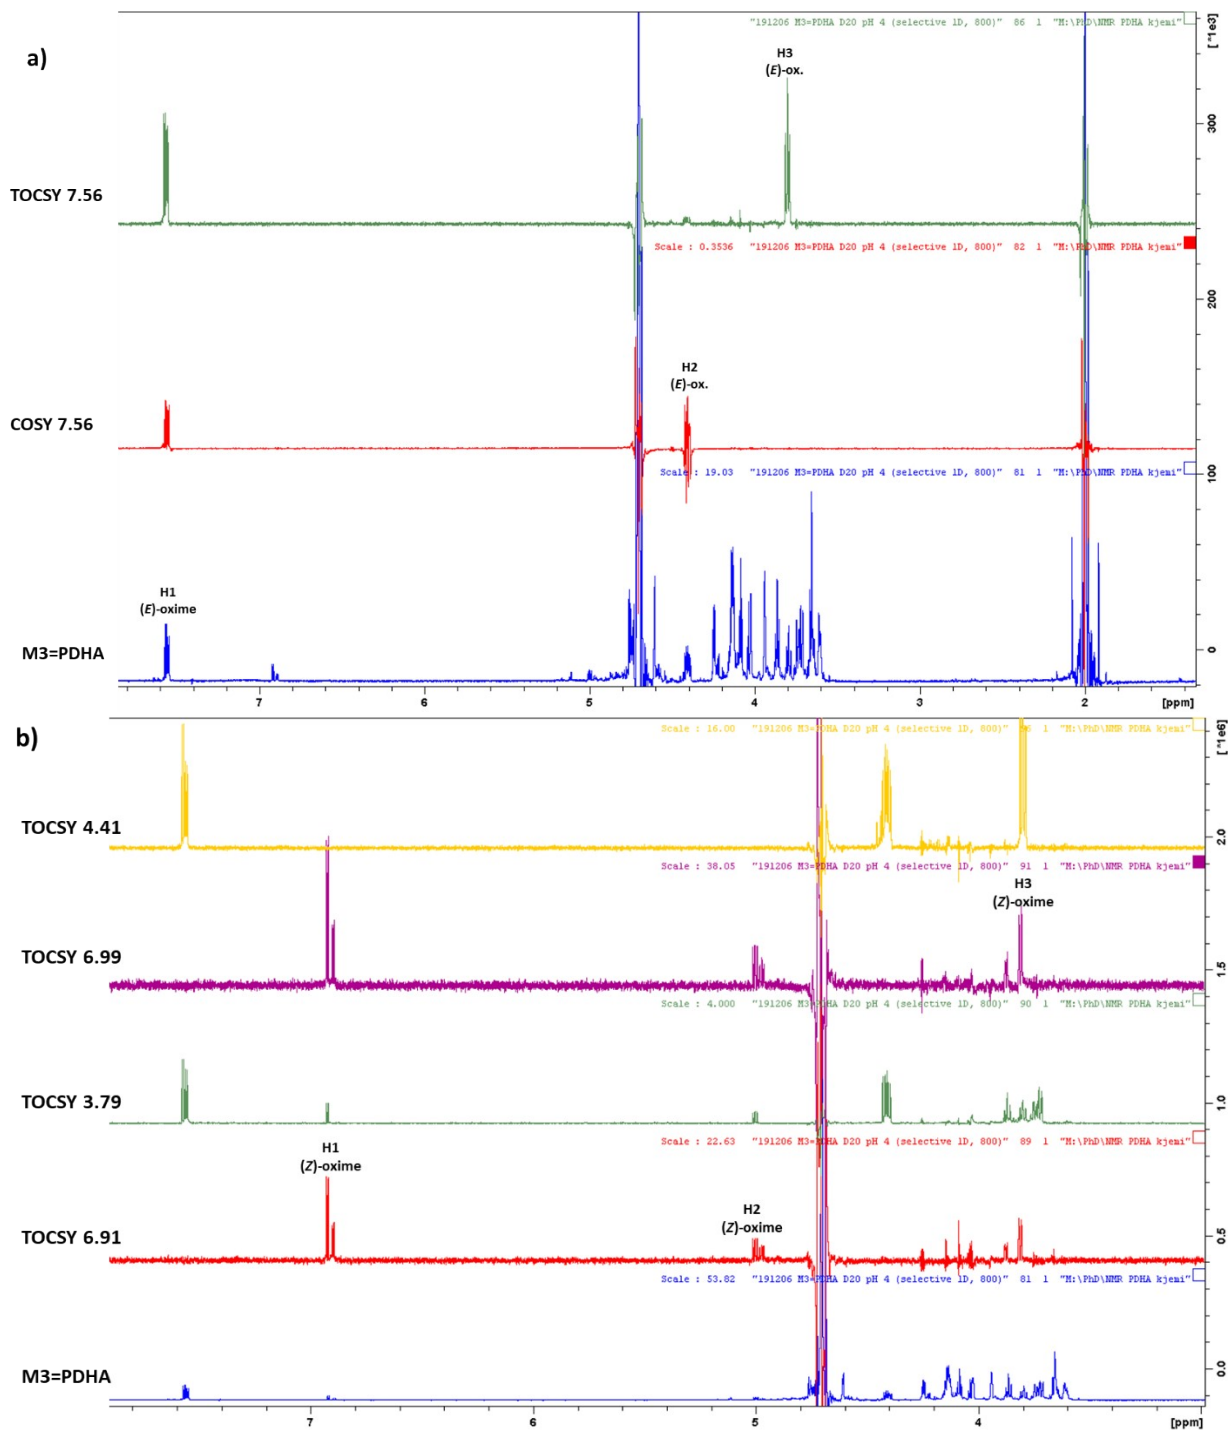

**Fig. S13** 1D selective COSY and TOCSY NMR spectra of M<sub>3</sub>-PDHA (after purification) in D<sub>2</sub>O, pH 4 (25 °C, 800 MHz). a) Assignment of H1-H3 of the (E)-oxime, and b) assignment of H1-H3 of the (Z)-oxime. The ppm of the pulse is indicated to the left.

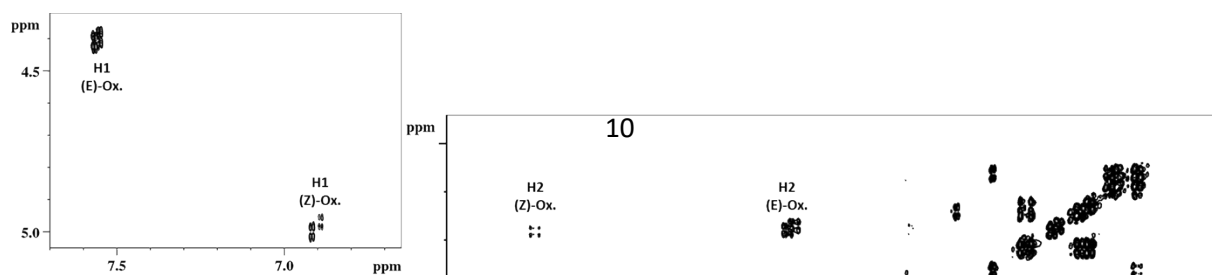

**Fig. S14**  $^1\text{H}$ - $^1\text{H}$  COSY spectra of the oxyamine modified trimannuronate ( $\text{M}_3$ -PDHA) (after purification by GFC, dialysis and freeze drying) in  $\text{D}_2\text{O}$  pH 4 (25 °C, 800 MHz).

**Table S2:** Assignment of chemical shifts for oxyamine modified trimannuronate ( $\text{M}_3$ -PDHA) (after purification by GFC, dialysis and freeze drying) in  $\text{D}_2\text{O}$  pH 4 obtained from 1D selective and heteronuclear NMR experiments. Prime indicates the minor form.

|                  | H/C 1       | H/C 1'      | H/C 2       | H/C 3       | H/C 4      | H/C 5       | C 6   |
|------------------|-------------|-------------|-------------|-------------|------------|-------------|-------|
| <b>(E)-oxime</b> | 7.61; 151.7 | 7.65; 151.7 | 4.40; 68.04 | 3.79; 75.65 | 4.11; 77.6 | 4.25; 71.31 | 178.1 |
| <b>(Z)-oxime</b> | 6.96; 151.6 | 7.00; 151.3 | 4.98; 63.1  | 3.79; 75.65 | 4.11; 77.6 | 4.25; 71.31 | 178.1 |

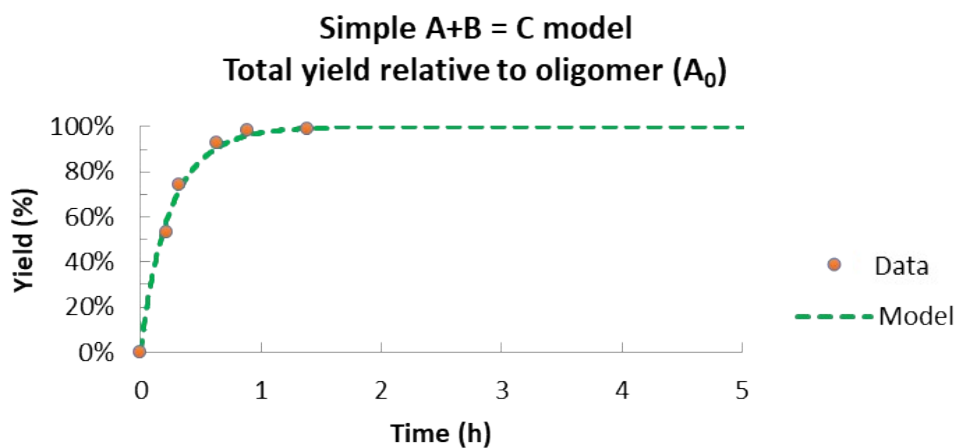

**Fig. S15** Plot with combined yield for conjugation with  $\text{M}_3$  (7 mM) and PDHA (2 equiv.) (500 mM AcOHd4 pD 4) studied by time course NMR (at 27 °C using the 600 MHz). Data obtained by integration using TSP as internal standard. A simple model assuming first order kinetics based on combined yield is included.

## Conjugation with ADH

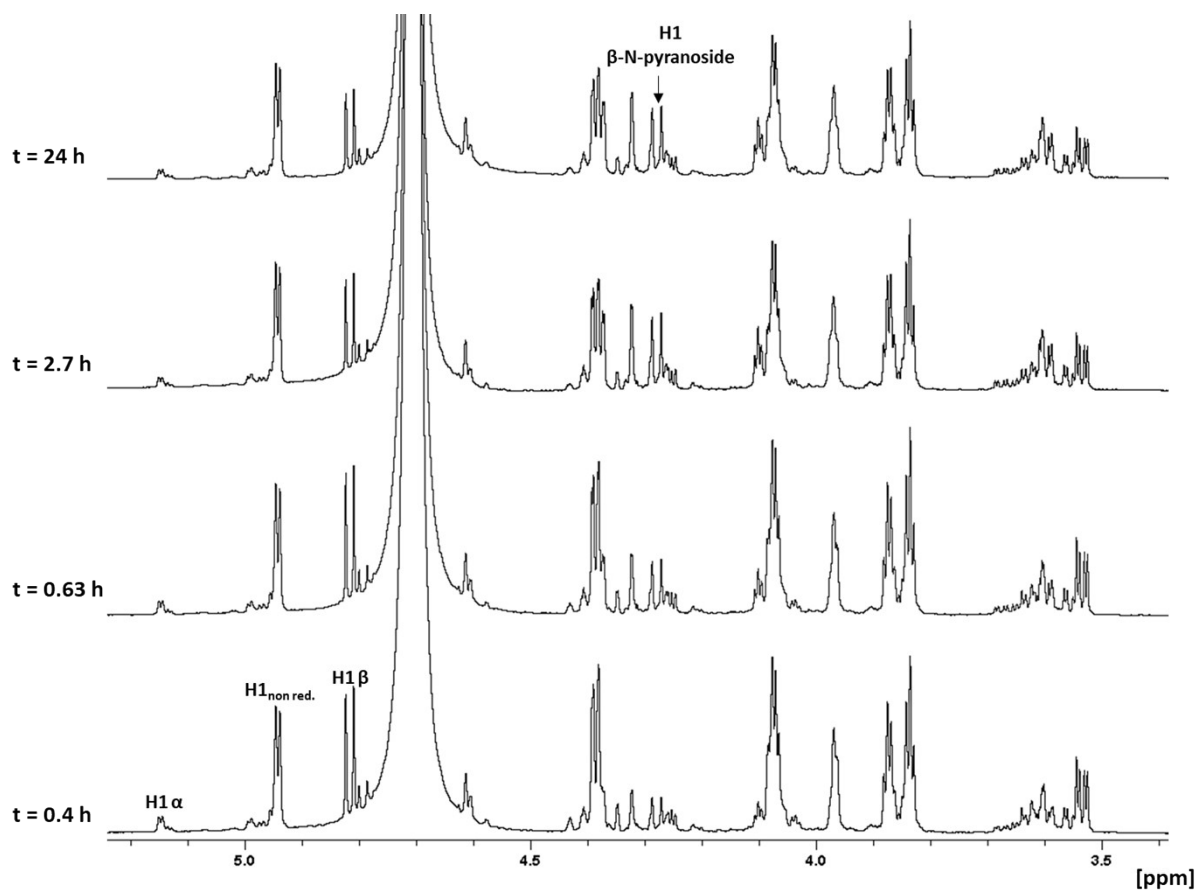

**Fig. S16** Stack of <sup>1</sup>H-NMR spectra (27 °C, 600 MHz) obtained at different time points for the reaction with G<sub>2</sub> (7mM) and ADH (2 equiv.) at pD 4 (500 mM AcOHd<sub>4</sub>).

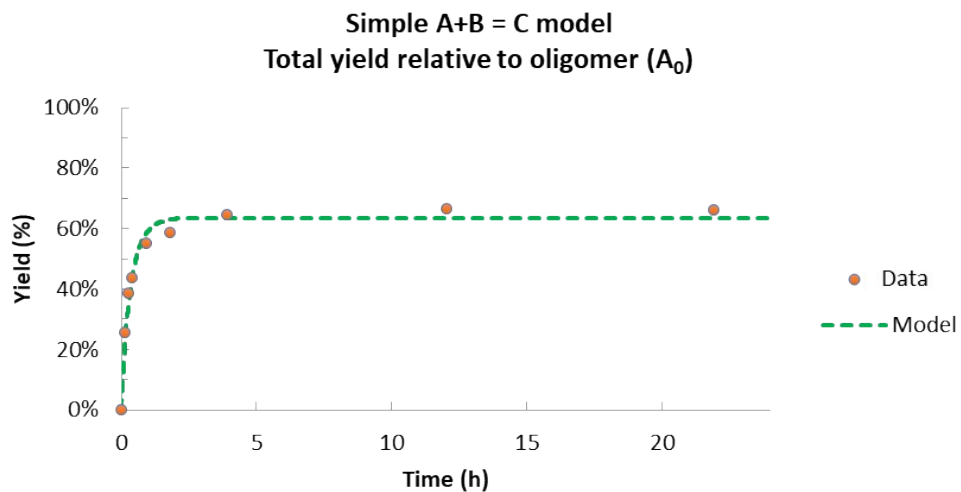

**Fig. S17** Plot with combined yield for conjugation with  $G_2$  (7 mM) and ADH (2 equiv.) (500 mM AcOHd4 pD 4) studied by time course NMR (at 27 °C using a 600 MHz magnet). Data obtained by integration using H1 of the non-reducing end as internal standard. A simple model assuming first order kinetics based on combined yield is included.

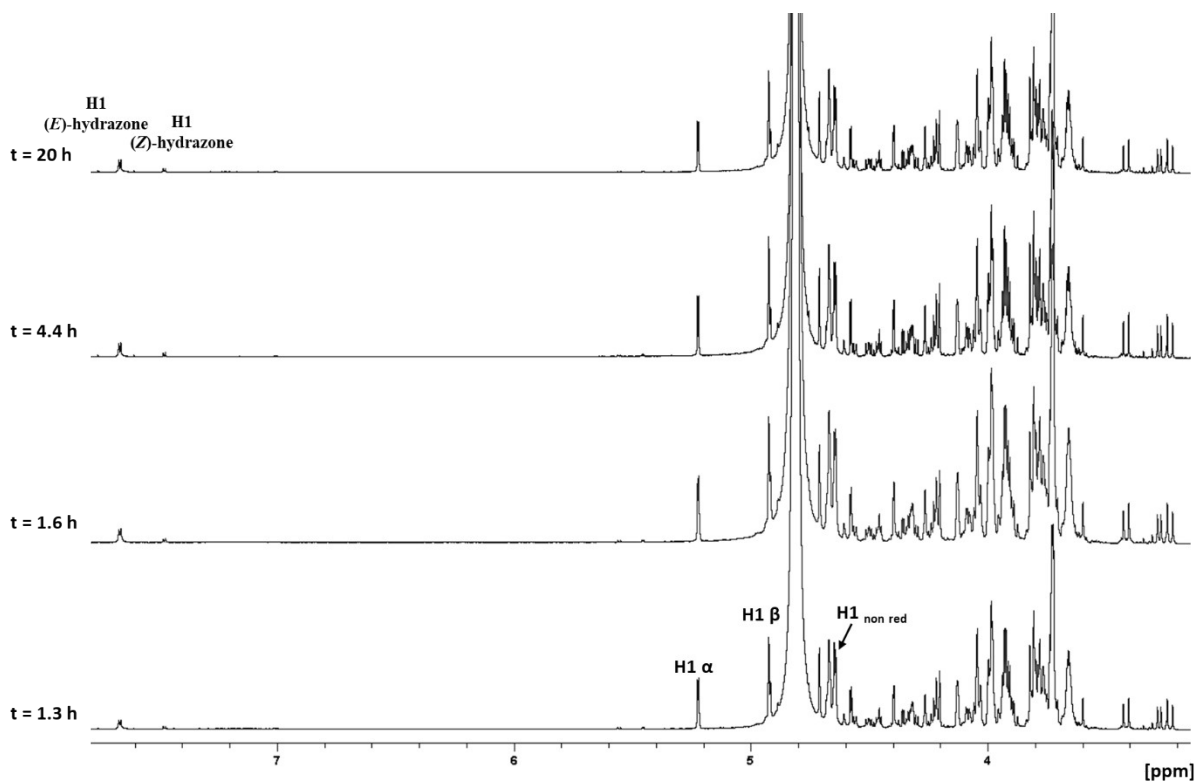

**Fig. S18** Stack of  $^1\text{H-NMR}$  (27 °C, 600 MHz) spectra obtained at different time points for the reaction with  $\text{M}_3$  (7mM) and ADH (2 equiv.) at pD 4 (500 mM  $\text{AcOHd}_4$ ).

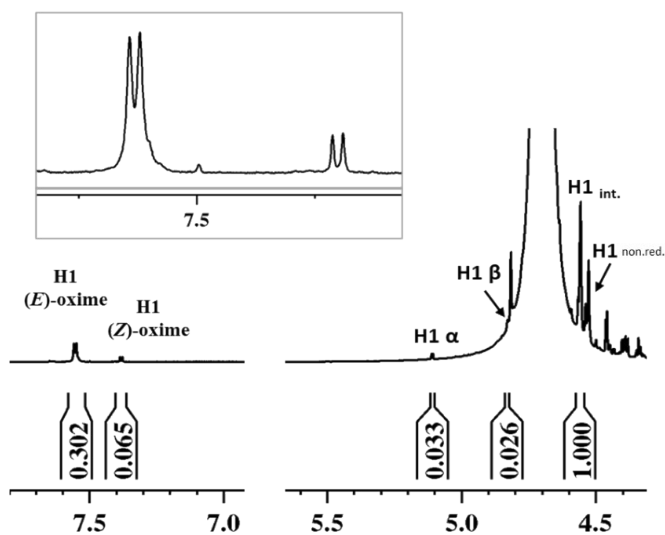

**Fig. S19**  $^1\text{H-NMR}$  (27 °C, 600 MHz) spectrum of the equilibrium reaction mixture ( $t > 20$  h) for the reaction with  $\text{M}_3$  (7mM) and ADH (10 equiv.) (500 mM  $\text{AcOHd}_4$  pD 4).

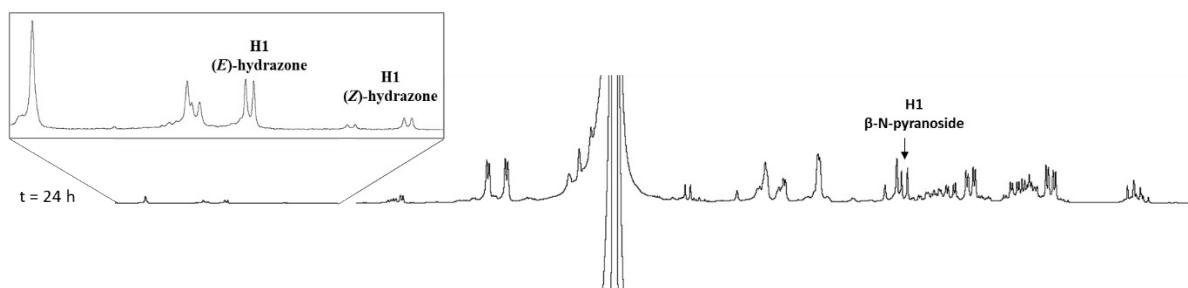

**Fig. S20** Stack of  $^1\text{H-NMR}$  (27 °C, 600 MHz) spectra obtained at different time points for the reaction with Galacturonic acid DP 3 (TriGalA<sub>3</sub>) (7mM) and ADH (2 equiv.) at pD 4 (500 mM AcOHd4). A spectrum of pure TriGalA is included for comparison.

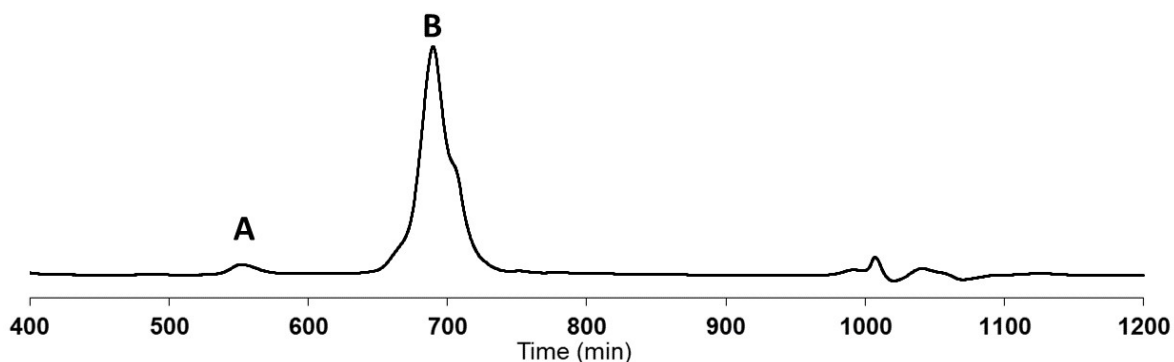

**Fig. S21** GFC fractions of the products formed in the reaction with G<sub>10</sub> and PDHA (10 equiv.) with PB (3 equiv).

Product having elution times corresponding to peak B (Fig. S21) is in agreement with G<sub>10</sub>-PDHA. Peak A has elution volumes corresponding to a G<sub>10</sub>-PDHA-G<sub>10</sub> based on comparison to a G<sub>n</sub> hydrolysate.

Attachment of the second block: A-b-B diblock polysaccharides

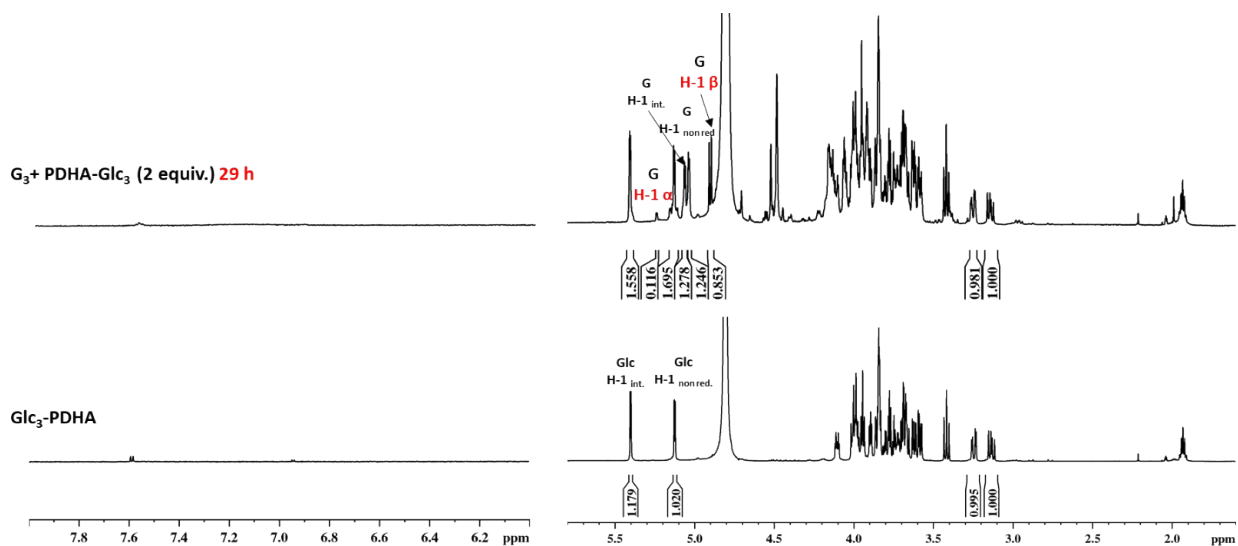

**Fig. S22**  $^1\text{H-NMR}$  (27 °C, 600 MHz) spectrum of the reaction mixture with  $\text{G}_3$  (7mM) and maltotriose DP 3 with PDHA ( $\text{Glc}_3\text{-PDHA}$ ) (2 equiv.) (500 mM  $\text{AcOHd4}$  pD 4). Purified  $\text{Glc}_3\text{-PDHA}$  (in 500 mM  $\text{AcOHd4}$  pD 4) is included for comparison.

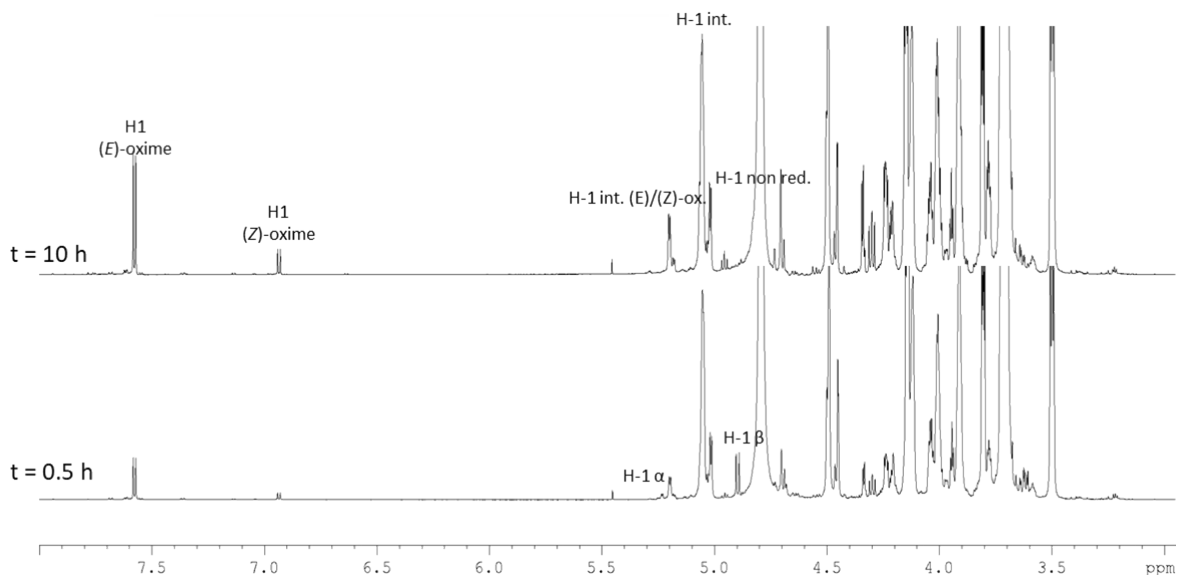

**Fig. S23** Stack of  $^1\text{H-NMR}$  (27 °C, 600 MHz) spectra obtained at different time points for the reaction with  $\text{G}_7$  (20.1 mM) and aminoxy- $\text{PEG}_5\text{-N}_3$  (2 equiv.) (500 mM  $\text{AcOHd4}$ , pD 4).

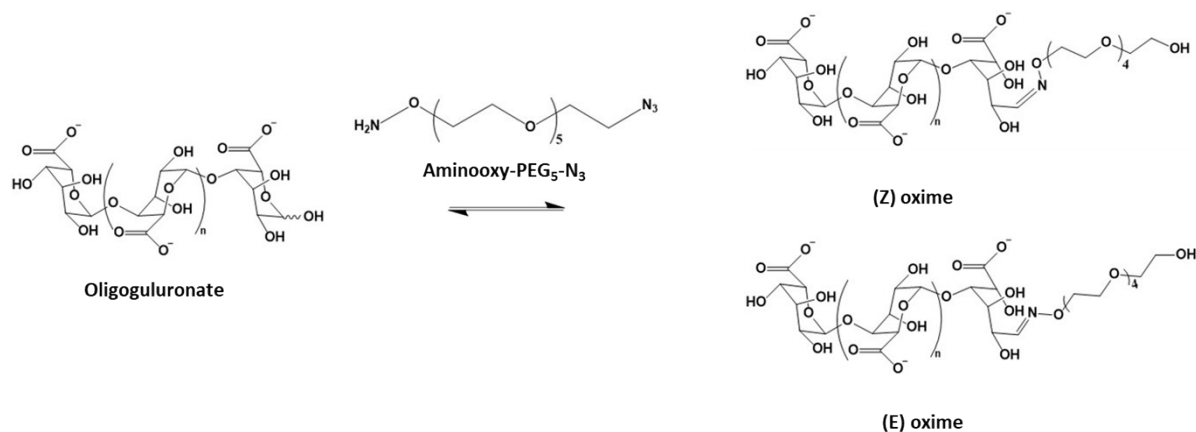

**Fig. S24** Reaction scheme for the reaction with  $\text{G}_7$  and aminoxy- $\text{PEG}_5\text{-N}_3$ .



Reduction of oximes/hydrazones/N-pyranosides with  $\alpha$ -picoline borane

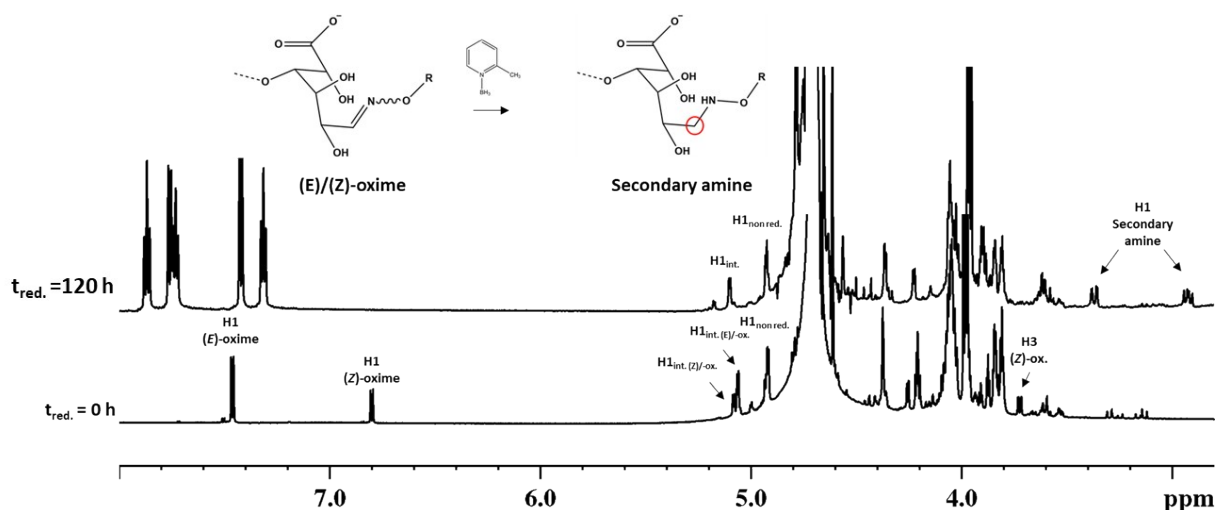

**Fig. S25**  $^1\text{H-NMR}$  (27 °C, 600 MHz) spectra of equilibrium reaction mixture with  $\text{G}_3$  (7mM) and PDHA (2 equiv.) before reduction ( $t_{\text{red.}} = 0$ ). PB (3 equiv.) was added to the reaction mixture and the spectrum obtained after 120 h is shown with annotation of the resonances from the secondary amine characteristic of the reduced conjugate.

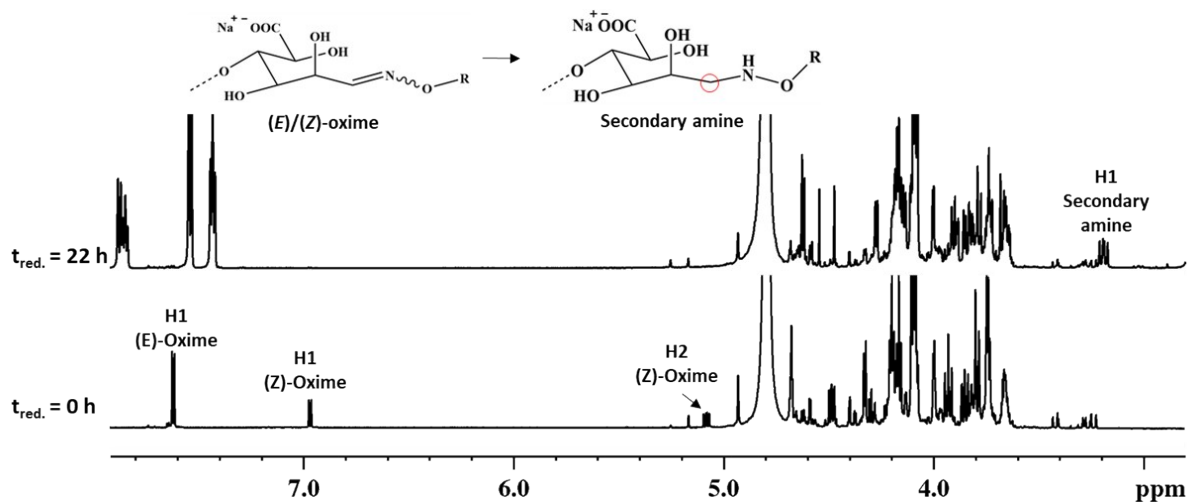

**Fig. S26**  $^1\text{H-NMR}$  (27 °C, 600 MHz) spectra of equilibrium reaction mixture with  $\text{M}_3$  (7mM) and PDHA (2 equiv.) before reduction ( $t_{\text{red.}} = 0$ ). PB (3 equiv.) was added to the reaction mixture and the spectrum obtained after 22 h is shown with annotation of key resonances.

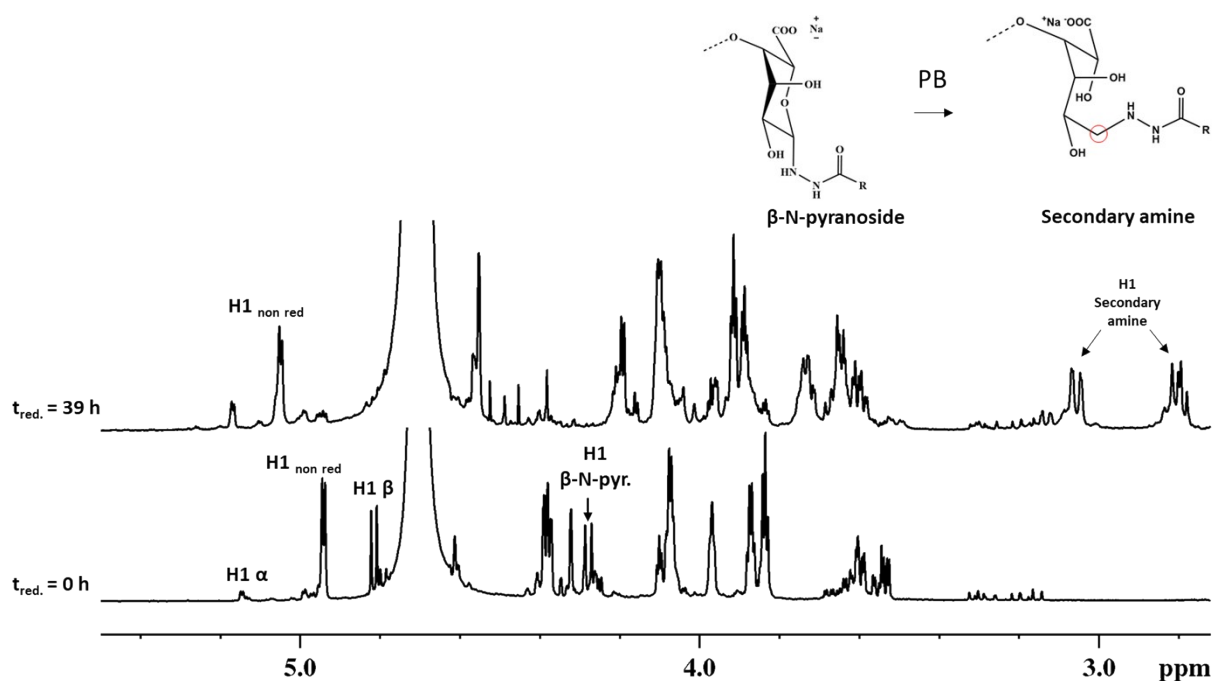

**Fig. S27**  $^1\text{H-NMR}$  (27 °C, 600 MHz) spectra of equilibrium reaction mixture with  $\text{G}_2$  (7mM) and ADH (2 equiv.) before reduction ( $t_{\text{red}} = 0$ ). PB (3 equiv.) was added to the reaction mixture and the spectrum obtained after 39 h is shown with annotation of key resonances.

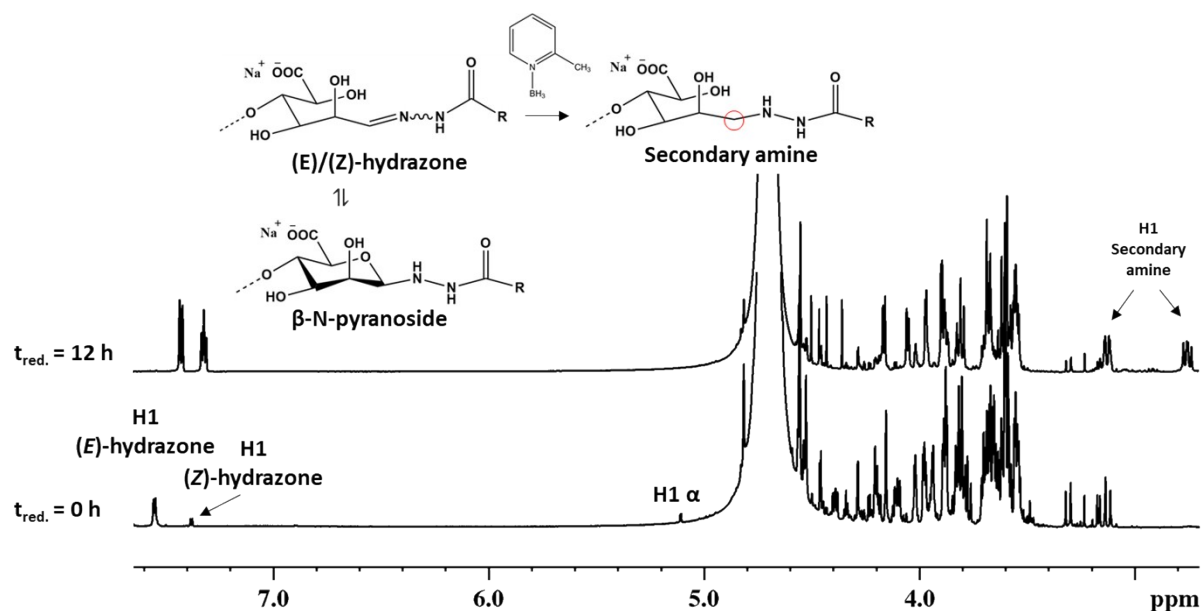

**Fig. S28**  $^1\text{H-NMR}$  (27 °C, 600 MHz) spectra of equilibrium reaction mixture with  $\text{M}_3$  (7mM) and ADH (10 equiv.) before reduction ( $t_{\text{red}} = 0$ ). PB (3 equiv.) was added to the reaction mixture and the spectrum obtained after 12 h is shown with annotation of key resonances.

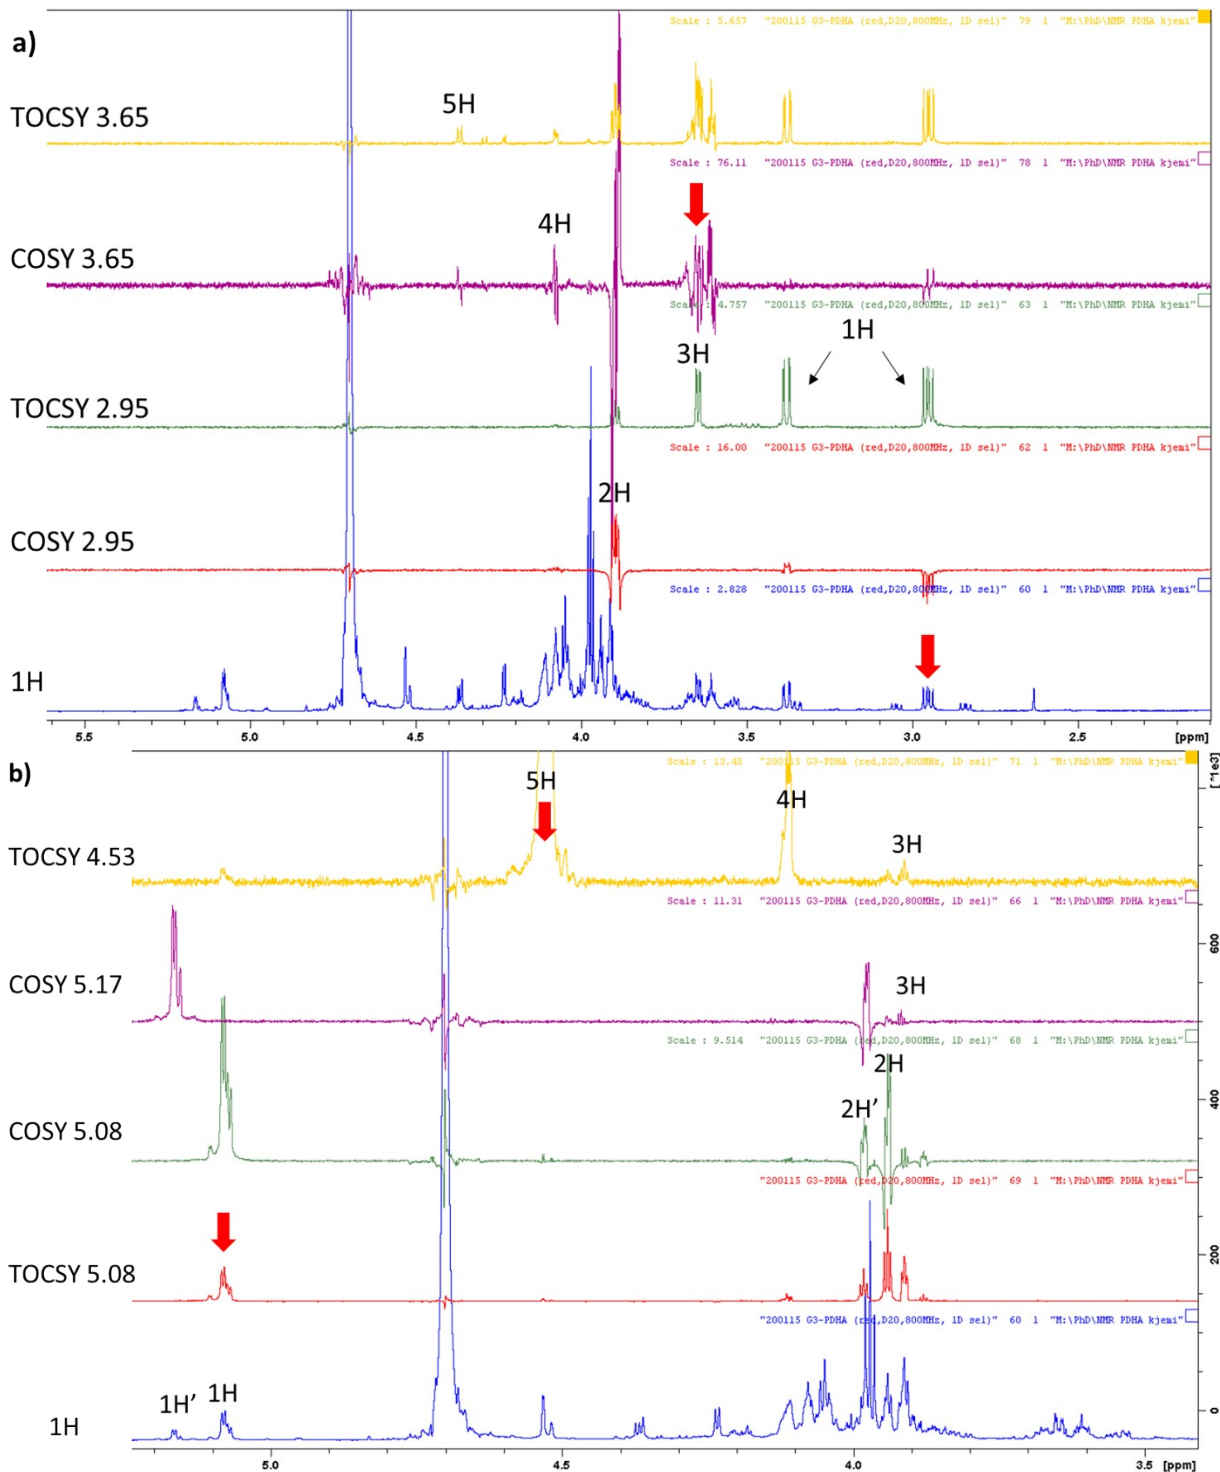

**Fig. S29** Assignment of key reducing end resonances from the oxyamine modified reducing end of  $G_2$ -PDAH (with reduction, after purification by GFC, dialysis and freeze drying) in  $D_2O$  at pH 5.1 (25  $^{\circ}C$ ,

800 MHz) using 1D selective COSY and TOCSY NMR. Red arrows indicate the ppm of the pulse.

**Table S3:** Assignment of proton resonances of G<sub>2</sub>-PDHA (with reduction, purified by GFC, dialysis and freeze drying). Dissolved in D<sub>2</sub>O, pH 5.1 by 1D selective COSY and TOCSY. RT is the modified reducing termini of G2-PDHA.

|            | H1        | H2        | H3   | H4   | H5   |
|------------|-----------|-----------|------|------|------|
| RT pH 5.1  | 2.96/3.38 | 3.90      | 3.65 | 4.08 | 4.37 |
|            | H1/H1'    | H2/H2'    |      |      |      |
| NRT pH 5.1 | 5.08/5.17 | 3.94/3.98 | 3.92 | 4.11 | 4.53 |

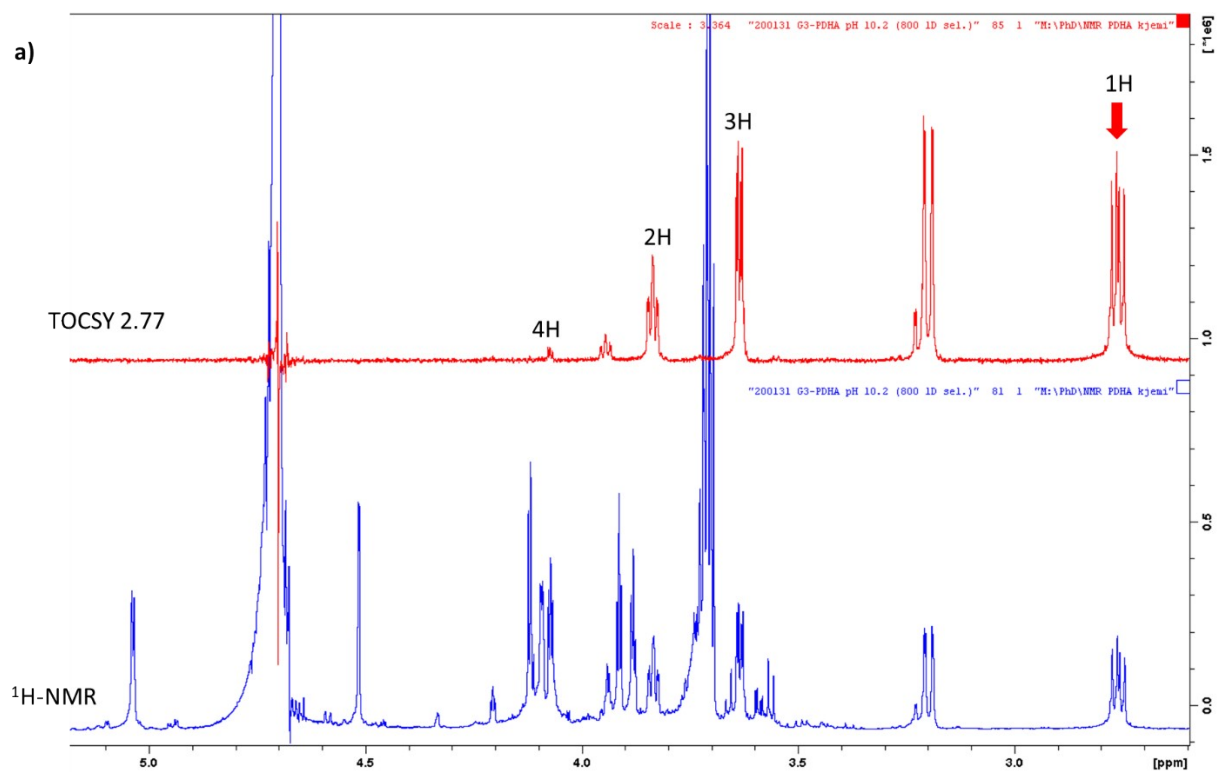

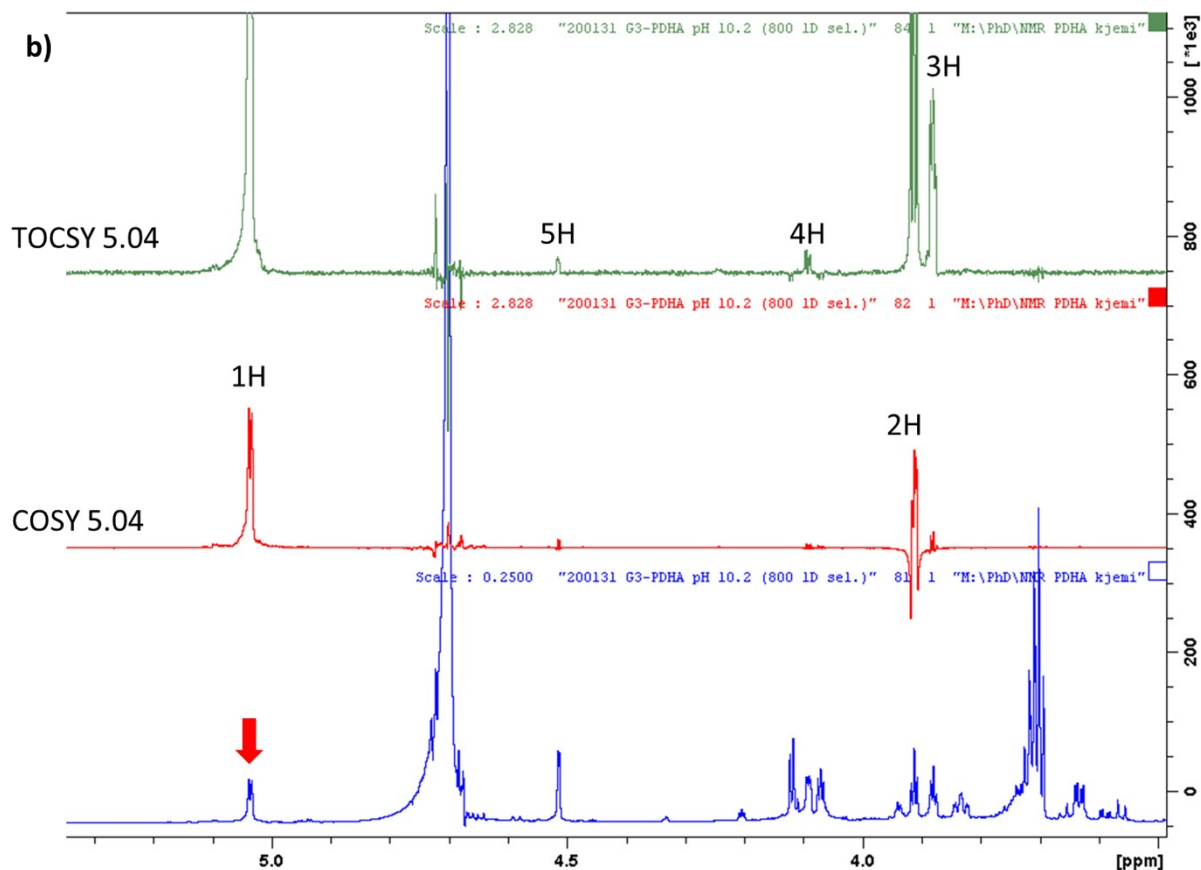

**Fig. S30** Assignment of key reducing end resonances from the oxyamine modified reducing end of G<sub>2</sub>-PDAH (with reduction, after purification by GFC, dialysis and freeze drying) in D<sub>2</sub>O at pH 10.2 (25 °C, 800 MHz) using 1D selective COSY and TOCSY NMR. Red arrows indicate the ppm of the pulse.

**Table S4:** Assignment of proton resonances of G<sub>2</sub>-PDHA (with reduction, purified by GFC, dialysis and freeze drying. Dissolved in D<sub>2</sub>O, pH 5.1) by 1D selective COSY and TOCSY. RE denotes is the oxyamine modified reducing end of G<sub>2</sub>-PDHA. N.d. denotes not determined.

|             | H1        | H2   | H3   | H4   | H5   |
|-------------|-----------|------|------|------|------|
| RE pH 10.2  | 3.20/2.76 | 3.84 | 3.63 | 4.07 | n.d. |
| NRT pH 10.2 | 5.04      | 3.91 | 3.88 | 4.09 | 4.52 |

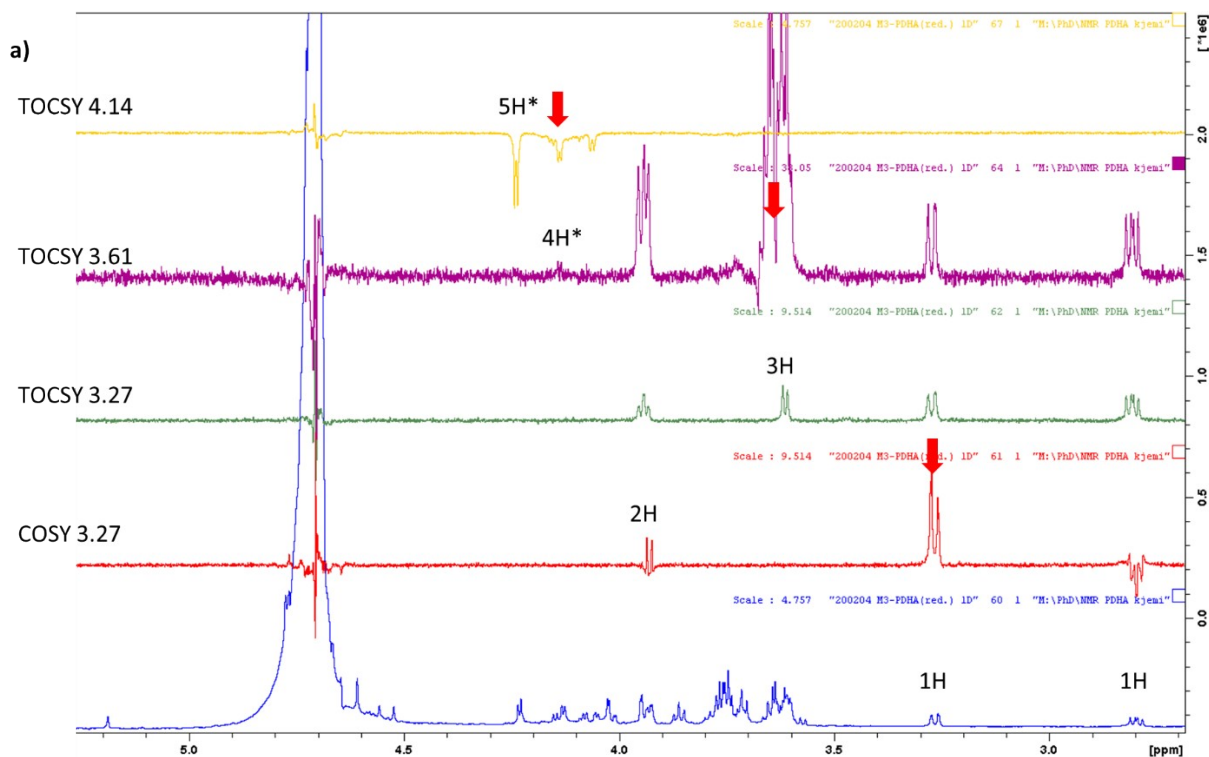

**Fig. S31** Assignment of key reducing end resonances from the oxyamine modified reducing end of M<sub>3</sub>-PDHA (with reduction, after purification by GFC, dialysis and freeze drying) in D<sub>2</sub>O at pH 10.2 (25°C, 800 MHz) using 1D selective COSY and TOCSY NMR. Red arrows indicate the ppm of the pulse.

**Table S5:** Assignment of the modified reducing end (RE) of M<sub>3</sub>-PDHA (with reduction, after purification by GFC, dialysis and freeze drying) in D<sub>2</sub>O at pH 10.2 (800 MHz) using 1D selective COSY and TOCSY NMR. \*Weak magnetization transfer

|                   | H1        | H2   | H3   | H4    | H5   |
|-------------------|-----------|------|------|-------|------|
| <b>RE pH 10.7</b> | 2.80/3.27 | 3.93 | 3.61 | 4.14* | n.d. |

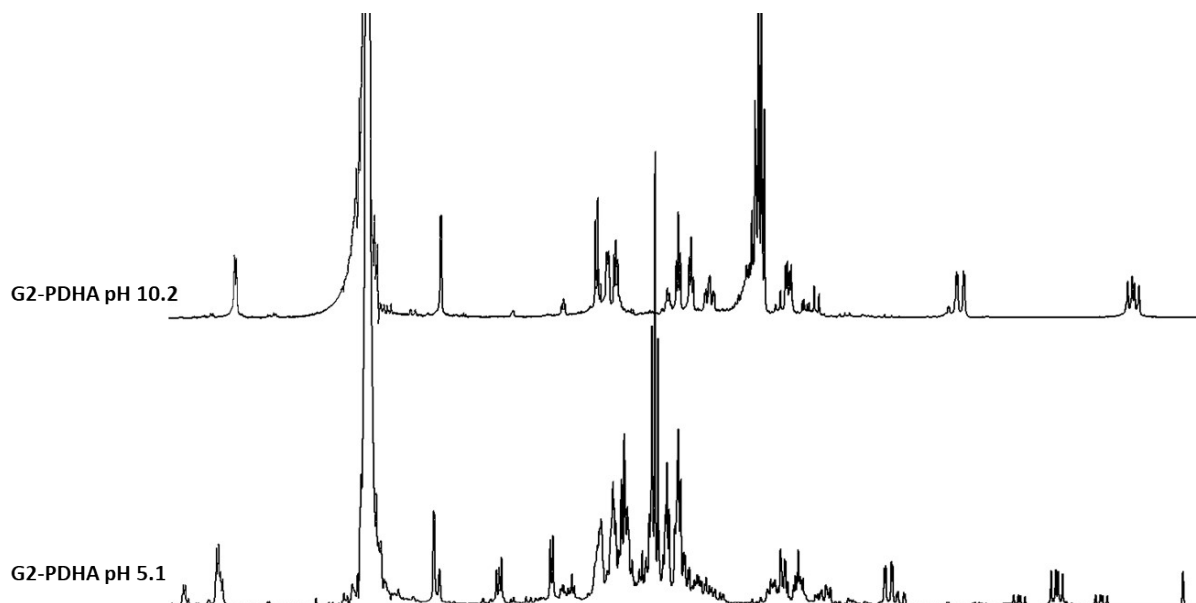

**Fig. S32**  $^1\text{H-NMR}$  (27 °C, 600 MHz) spectra of  $\text{G}_2$ -PDHA after purification by GFC and dialysis. The sample was dissolved in  $\text{D}_2\text{O}$  and pH was adjusted from 5.1 to 10.2 with NaOD.

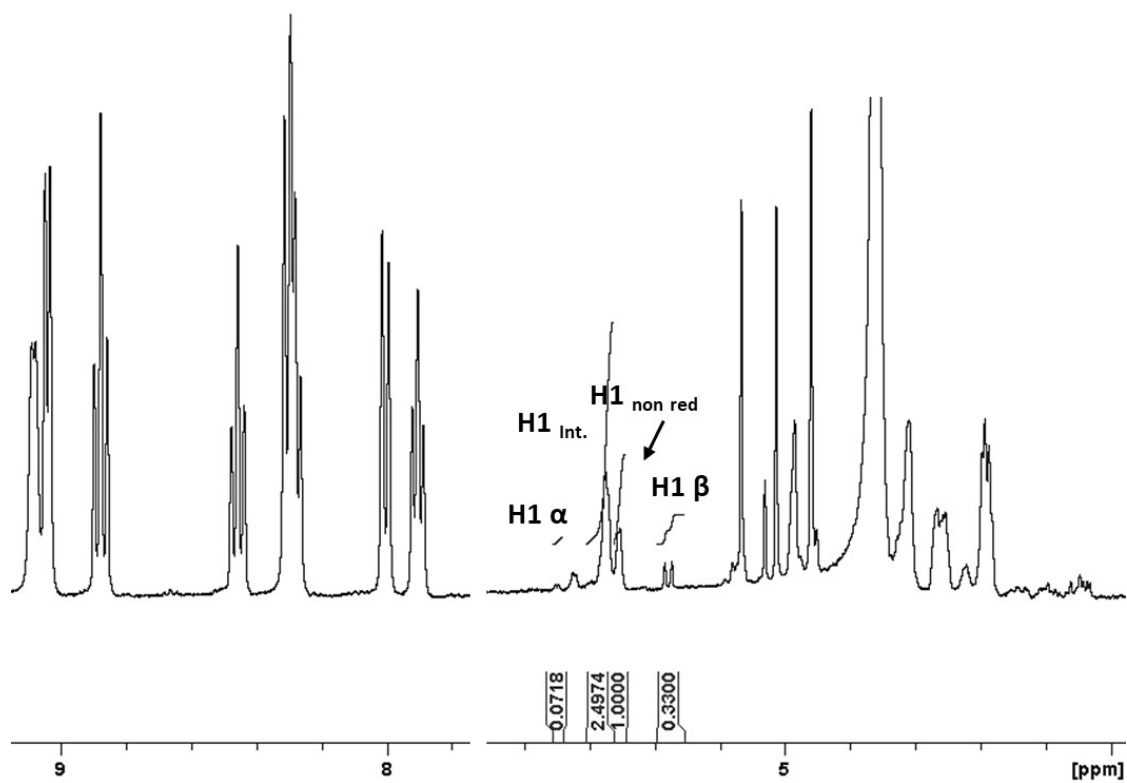

**Fig. S33**  $^1\text{H-NMR}$  spectra of  $\text{G}_6$  (20.1 mM) with PB (20 equiv.) in 500 mM AcOHd4 pD 4 at incubated in water bath at 40°C, recorded after 24 h (82°C, 400 MHz).

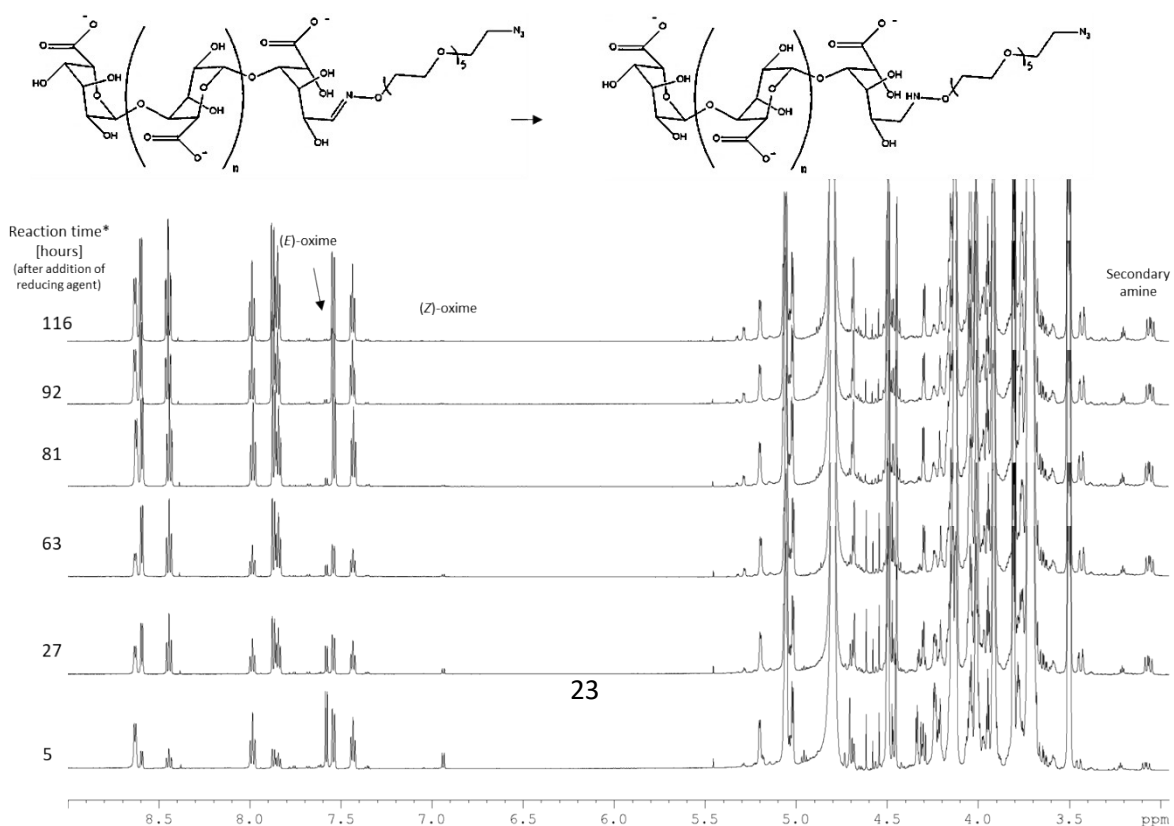

**Fig. S34**  $^1\text{H-NMR}$  (27 °C, 600 MHz) spectra of the reduction of the equilibrium rx. mixture with G7 (20.1 mM) and aminoox-PEG<sub>5</sub>-N<sub>3</sub> after addition of PB (3 equiv. added at t<sub>0</sub>, another 3 equiv. added after 72 h).

### Alginate-based diblock polysaccharides

A symmetrical diblock was prepared with G<sub>10</sub> and PDHA (using 0.5 equiv.) and by reduction with PB. Excess PB was removed by dialysis and the sample was freeze dried. The reaction mixture was analysed by SEC-MALS (the sample was not purified by GFC) with an in-line viscosity detector.

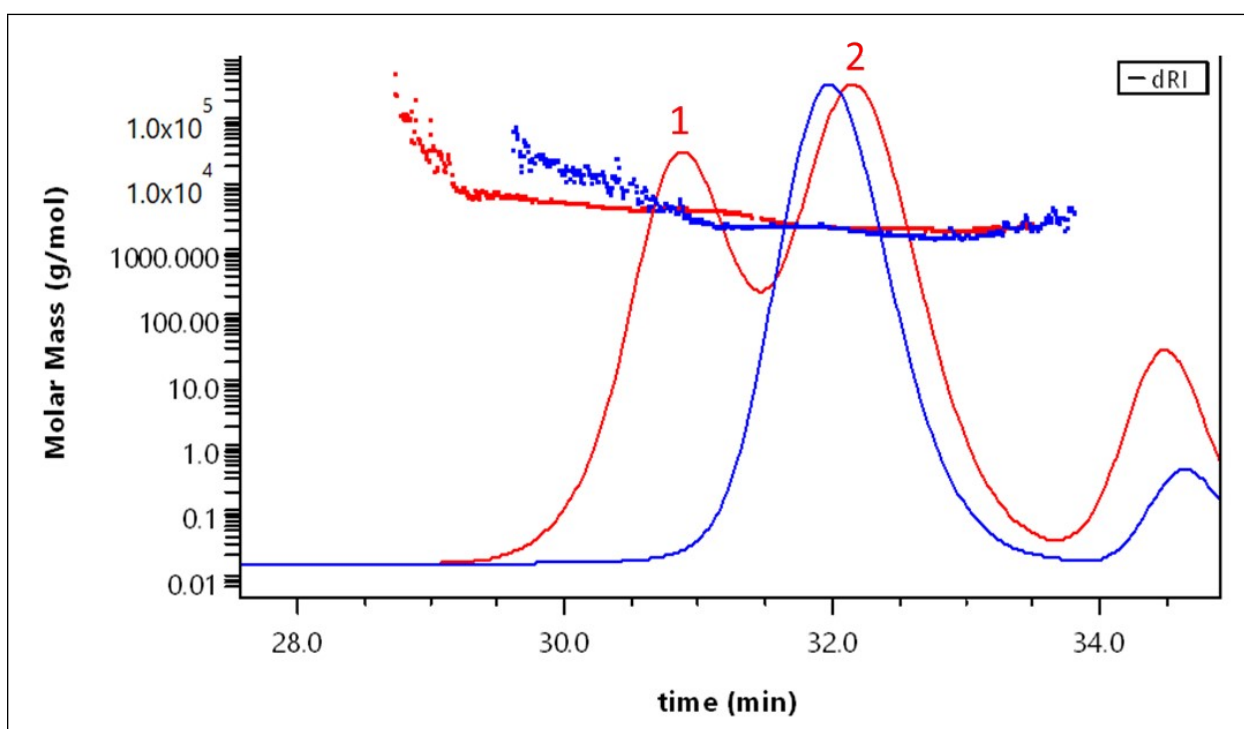

**Fig. S35** A symmetrical G<sub>10</sub> was reacted with 0.5 equivalents PDHA, and the reaction mixture was analysed by SEC-MALS (red). A G<sub>10</sub> was included for comparison (blue). The coupling to form a diblock (G<sub>10</sub>-PDHA-G<sub>10</sub>) is manifested by a significant shift in elution volume (peak 1). Unreacted G<sub>10</sub> and G<sub>10</sub>-PDHA comprise approximately 50 – 60 % of the sample (peak 2), and elutes close to pure G<sub>10</sub>. Data are summarized in table S6.

**Table S6:** Molar mass averages of a G<sub>10</sub>-b-G<sub>10</sub> block (prepared by reacting G<sub>10</sub> with 0.5 equiv. PDHA with reduction by PB, without purification by GFC) and the starting material (G<sub>10</sub>). G<sub>23</sub> is included for comparison of intrinsic viscosities (see text). The data were obtained from SEC-MALS with an in-line viscosity detector, the plot of molar mass vs. time is shown in Fig. S35.

| Sample          | M <sub>n</sub> (kDa) | M <sub>w</sub> (kDa) | DP <sub>n</sub> | [η] <sub>w</sub> (mL/g) |
|-----------------|----------------------|----------------------|-----------------|-------------------------|
| G <sub>10</sub> | 2.0                  | 2.0                  | 10              | 6.7                     |



|                                                          |     |     |    |      |
|----------------------------------------------------------|-----|-----|----|------|
| G <sub>10</sub> -PDHA-G <sub>10</sub> (peak 1, Fig. S35) | 4.1 | 4.2 | 20 | 10.1 |
| G <sub>10</sub> (peak 2, Fig. S35)                       | 2.1 | 2.2 | 10 | 6.7  |

## References

1. Heyraud, A.; Gey, C.; Leonard, C.; Rochas, C.; Girond, S.; Kloareg, B., NMR spectroscopy analysis of oligoguluronates and oligomannuronates prepared by acid or enzymatic hydrolysis of homopolymeric blocks of alginic acid. Application to the determination of the substrate specificity of *Haliotis tuberculata* alginate lyase. *Carbohydrate Research* **1996**, *289*, 11-23.
2. Baudendistel, O. R.; Wieland, D. E.; Schmidt, M. S.; Wittmann, V., Real-Time NMR Studies of Oxyamine Ligations of Reducing Carbohydrates under Equilibrium Conditions. *Chemistry* **2016**, *22* (48), 17359-17365.
3. Mo, I. V.; Feng, Y.; Dalheim, M. Ø.; Solberg, A.; Aachmann, F. L.; Schatz, C.; Christensen, B. E., Activation of enzymatically produced chitooligosaccharides by dioxyamines and dihydrazides. *Carbohydrate Polymers* **2020**, *232*, 115748.
